# Supplementary material for: Impact of Sensitization of Family Caregivers upon Treatment Compliance among Geriatric Patients Suffering from Elder Abuse and Neglect
Source: Healthcare (Basel). 2021 Feb 18;9(2):226. doi: 10.3390/healthcare9020226 (PMC7922918; doi:10.3390/healthcare9020226)
Supplement: Supplementary file 1 [file healthcare-09-00226-s001.xlsx]

## Sheet: Main Survey 
F	A	58	C	Y	Y	Y	Y	Y	Y	Y	Y	Y	Y	Y	Y	Y	Y
F	A	66	C	Y	Y	Y	N	Y	Y	Y	Y	Y	Y	Y	Y	Y	Y
F	A	55	C	Y	Y	Y	Y	Y	Y	Y	Y	Y	Y	Y	Y	Y	Y
F	A	53	C	Y	Y	Y	Y	Y	Y	Y	Y	Y	Y	Y	Y	Y	Y
F	A	42	C	1	Y	Y	Y	Y	Y	Y	Y	Y	Y	Y	Y	Y	Y
F	A	70	C	Y	Y	Y	Y	Y	Y	Y	Y	Y	Y	Y	Y	Y	Y
F	A	41	C	1	1	Y	Y	Y	Y	Y	Y	Y	Y	Y	Y	Y	Y
F	A	54	C	Y	Y	Y	Y	Y	Y	Y	Y	Y	Y	Y	Y	Y	Y
F	A	68	C	Y	Y	Y	Y	Y	Y	Y	Y	Y	Y	Y	Y	Y	Y
F	A	56	C	Y	1	Y	Y	Y	Y	Y	Y	Y	Y	Y	Y	Y	Y
F	A	58	C	1	1	Y	Y	Y	Y	Y	Y	Y	Y	Y	Y	Y	Y
F	A	45	UC	Y	Y	Y	Y	Y	Y	Y	Y	Y	Y	Y	Y	Y	Y
F	A	41	C	1	1	Y	Y	Y	Y	Y	Y	Y	Y	Y	Y	Y	Y
F	A	57	C	1	1	Y	Y	Y	Y	Y	Y	Y	Y	Y	Y	Y	Y
F	A	59	C	1	1	Y	Y	Y	Y	Y	Y	Y	Y	Y	Y	Y	Y
F	A	56	C	Y	Y	Y	Y	Y	Y	Y	Y	Y	Y	Y	Y	Y	Y
F	A	45	C	Y	Y	Y	Y	Y	Y	Y	Y	Y	Y	Y	Y	Y	Y
F	A	56	C	Y	Y	Y	Y	Y	Y	Y	Y	Y	Y	Y	Y	Y	Y
F	A	45	UC	Y	Y	Y	Y	Y	Y	Y	Y	Y	Y	Y	Y	Y	Y
F	A	57	C	1	Y	Y	Y	Y	Y	Y	Y	Y	Y	Y	Y	Y	Y
F	A	54	C	Y	Y	Y	Y	Y	Y	Y	Y	Y	Y	Y	Y	Y	Y
F	A	52	C	Y	Y	Y	Y	Y	Y	Y	Y	Y	Y	Y	Y	Y	Y
F	A	52	C	Y	Y	Y	Y	Y	Y	Y	Y	Y	Y	Y	Y	Y	Y
F	A	44	C	Y	Y	Y	Y	Y	N	Y	Y	Y	Y	Y	Y	Y	Y
F	A	47	C	Y	Y	Y	Y	Y	Y	Y	Y	Y	Y	Y	Y	Y	Y
F	A	59	C	Y	Y	Y	Y	Y	Y	Y	Y	Y	Y	Y	Y	Y	Y
F	A	56	C	Y	Y	Y	Y	Y	Y	Y	Y	Y	Y	Y	Y	Y	Y
F	A	52	C	Y	Y	Y	Y	Y	Y	Y	Y	Y	Y	Y	Y	Y	Y
F	A	44	C	Y	Y	Y	Y	Y	Y	Y	Y	Y	Y	Y	Y	Y	Y
F	A	45	C	Y	Y	Y	Y	Y	Y	Y	Y	Y	Y	Y	Y	Y	Y
F	A	45	UC	Y	Y	Y	Y	Y	Y	Y	Y	Y	Y	Y	Y	Y	Y
F	A	45	UC	Y	Y	Y	Y	Y	Y	Y	Y	Y	Y	Y	Y	Y	Y
F	A	45	UC	Y	Y	Y	Y	Y	Y	Y	Y	Y	Y	Y	Y	Y	Y
F	A	45	UC	Y	Y	Y	Y	Y	Y	Y	Y	Y	Y	Y	Y	Y	Y
F	A	44	C	Y	Y	Y	Y	Y	N	Y	Y	Y	Y	Y	Y	Y	Y
F	A	45	UC	Y	Y	Y	N	Y	Y	Y	N	Y	Y	Y	Y	Y	Y
F	A	66	UC	Y	Y	Y	Y	Y	Y	Y	Y	Y	Y	Y	Y	Y	Y
F	A	45	UC	Y	Y	Y	Y	Y	Y	Y	Y	Y	Y	Y	Y	Y	Y
F	A	56	C	Y	Y	Y	Y	Y	Y	Y	Y	Y	Y	Y	Y	Y	Y
F	A	66	UC	Y	Y	Y	Y	Y	Y	Y	Y	Y	Y	Y	Y	Y	Y
F	A	67	C	Y	Y	Y	Y	Y	Y	Y	Y	Y	Y	Y	Y	Y	Y
F	A	77	UC	Y	Y	Y	Y	Y	Y	Y	Y	Y	Y	Y	Y	Y	Y
F	A	66	C	Y	Y	Y	Y	Y	Y	Y	Y	Y	Y	Y	Y	Y	Y
F	A	55	C	Y	Y	Y	Y	Y	Y	Y	Y	Y	Y	Y	Y	Y	Y
F	A	54	C	Y	Y	Y	N	Y	N	Y	Y	Y	Y	Y	Y	Y	Y
F	A	53	C	Y	Y	Y	Y	Y	Y	Y	Y	Y	Y	Y	Y	Y	Y
F	A	52	C	Y	Y	Y	Y	Y	Y	Y	Y	Y	Y	Y	Y	Y	Y
F	A	52	C	Y	Y	Y	Y	Y	Y	Y	Y	Y	Y	Y	Y	Y	Y
F	A	44	C	Y	N	Y	N	Y	Y	Y	Y	Y	Y	Y	Y	Y	Y
F	A	57	C	Y	Y	Y	Y	Y	Y	Y	N	Y	Y	Y	Y	Y	Y
F	A	56	C	Y	Y	Y	Y	Y	Y	Y	Y	Y	N	Y	Y	Y	Y
F	A	46	C	Y	Y	Y	Y	Y	Y	Y	Y	Y	Y	Y	Y	Y	Y
F	A	65	C	Y	Y	Y	Y	Y	Y	Y	Y	Y	Y	Y	Y	Y	Y
F	A	44	C	Y	Y	Y	Y	Y	Y	Y	N	Y	Y	Y	Y	Y	Y
F	A	65	C	Y	Y	N	Y	Y	Y	Y	Y	Y	Y	Y	Y	Y	Y
F	A	55	C	Y	Y	Y	Y	Y	Y	Y	Y	Y	Y	Y	Y	Y	Y
F	A	47	C	Y	Y	Y	Y	Y	Y	Y	Y	Y	Y	Y	Y	Y	Y
F	A	54	C	Y	Y	Y	Y	Y	Y	Y	Y	Y	Y	Y	Y	Y	Y
F	A	45	UC	Y	Y	Y	Y	Y	Y	Y	Y	N	Y	Y	Y	Y	Y
F	A	58	C	Y	Y	Y	Y	Y	Y	Y	Y	Y	Y	Y	Y	Y	Y
F	A	57	C	Y	Y	Y	Y	Y	Y	Y	Y	Y	Y	Y	Y	Y	Y
F	A	65	C	Y	Y	Y	Y	Y	Y	Y	Y	Y	Y	N	Y	Y	Y
F	A	45	C	Y	Y	Y	Y	Y	Y	Y	Y	Y	Y	Y	Y	Y	Y
F	A	58	C	Y	Y	Y	Y	Y	Y	Y	Y	Y	Y	Y	Y	Y	Y
F	A	55	C	Y	Y	Y	Y	Y	Y	Y	Y	Y	Y	Y	Y	Y	Y
F	A	61	C	Y	Y	Y	Y	Y	Y	Y	Y	Y	Y	Y	Y	Y	Y
F	A	62	C	Y	Y	Y	Y	Y	Y	Y	Y	Y	Y	Y	Y	Y	Y
F	A	54	C	Y	Y	Y	Y	Y	Y	Y	Y	Y	Y	Y	Y	Y	Y
F	A	59	C	Y	Y	Y	Y	Y	Y	Y	Y	Y	Y	Y	Y	Y	Y
F	A	66	C	Y	Y	Y	Y	Y	Y	Y	Y	Y	Y	Y	Y	Y	Y
F	A	53	C	Y	Y	Y	Y	Y	Y	Y	Y	Y	Y	Y	Y	Y	Y
F	A	45	UC	Y	Y	Y	Y	Y	Y	Y	Y	Y	Y	Y	Y	Y	Y
F	A	56	C	Y	Y	Y	Y	Y	Y	Y	Y	Y	Y	Y	Y	Y	Y
F	A	66	C	Y	Y	Y	Y	Y	N	Y	Y	Y	Y	Y	Y	Y	Y
F	A	52	C	Y	Y	Y	Y	Y	N	Y	Y	Y	Y	Y	Y	Y	Y
F	A	54	C	Y	Y	Y	Y	Y	Y	Y	Y	Y	Y	Y	Y	Y	Y
F	A	58	C	Y	Y	Y	Y	Y	Y	Y	Y	Y	Y	Y	Y	Y	Y
F	A	53	C	Y	Y	Y	Y	Y	Y	Y	Y	Y	Y	Y	Y	Y	Y
F	A	69	C	Y	Y	Y	Y	Y	Y	Y	Y	Y	Y	Y	Y	Y	Y
F	A	45	UC	Y	Y	Y	Y	Y	Y	Y	Y	Y	Y	Y	Y	Y	Y
F	A	58	C	Y	Y	Y	Y	Y	Y	Y	Y	Y	Y	Y	Y	Y	Y
F	A	45	UC	Y	Y	Y	Y	Y	Y	Y	Y	Y	Y	Y	Y	Y	Y
F	A	43	C	Y	Y	Y	Y	Y	Y	Y	Y	Y	Y	Y	Y	Y	Y
F	A	70	C	Y	Y	Y	Y	Y	Y	Y	Y	Y	Y	Y	Y	Y	Y
F	A	42	C	Y	Y	Y	Y	Y	Y	Y	Y	Y	Y	Y	Y	Y	Y
F	A	66	C	Y	Y	Y	Y	Y	Y	Y	Y	Y	Y	Y	Y	Y	Y
F	A	70	C	Y	Y	Y	Y	Y	Y	Y	Y	Y	Y	Y	Y	Y	Y
F	A	56	C	Y	Y	Y	Y	Y	Y	Y	Y	Y	Y	Y	Y	Y	Y
F	A	61	C	Y	Y	Y	Y	Y	Y	Y	Y	Y	Y	Y	Y	Y	Y
F	A	70	C	Y	Y	Y	Y	Y	Y	Y	Y	Y	Y	Y	Y	Y	Y
F	A	76	C	Y	Y	Y	Y	Y	Y	Y	Y	Y	Y	Y	Y	Y	Y
F	A	54	C	Y	Y	N	Y	N	Y	Y	Y	Y	Y	Y	Y	Y	Y
F	A	56	C	Y	Y	Y	Y	Y	Y	Y	Y	Y	Y	Y	Y	Y	Y
F	A	70	C	Y	Y	Y	Y	Y	Y	Y	Y	Y	Y	Y	Y	Y	Y
F	A	55	C	Y	Y	Y	Y	Y	Y	Y	Y	Y	Y	Y	Y	Y	Y
F	A	65	C	Y	Y	Y	Y	Y	Y	Y	Y	Y	Y	Y	Y	Y	Y
F	A	67	C	Y	Y	Y	Y	Y	Y	Y	Y	Y	Y	Y	Y	Y	Y
F	A	56	C	Y	Y	Y	Y	N	Y	Y	Y	Y	Y	Y	Y	Y	Y
F	A	54	C	Y	Y	Y	Y	Y	Y	N	Y	Y	N	N	Y	Y	Y
F	A	51	C	Y	Y	Y	Y	Y	Y	Y	Y	Y	Y	Y	Y	Y	Y
F	A	64	C	Y	Y	Y	Y	N	Y	Y	Y	Y	Y	Y	Y	Y	Y
F	A	66	C	Y	Y	Y	Y	Y	Y	Y	Y	Y	Y	Y	Y	Y	Y
F	A	67	C	Y	Y	Y	Y	Y	Y	Y	Y	Y	Y	Y	Y	Y	Y
F	A	45	UC	Y	Y	Y	Y	Y	Y	Y	Y	Y	Y	Y	Y	Y	Y
F	A	57	C	Y	Y	Y	Y	Y	Y	Y	Y	Y	Y	Y	Y	Y	Y
F	A	54	C	Y	Y	Y	Y	Y	Y	Y	Y	Y	Y	Y	Y	Y	Y
F	A	56	C	Y	Y	Y	Y	N	Y	Y	Y	Y	Y	Y	Y	Y	Y
F	A	51	C	Y	Y	Y	Y	Y	N	Y	N	Y	N	Y	Y	Y	Y
F	A	67	C	Y	Y	Y	Y	Y	Y	Y	Y	Y	Y	Y	Y	Y	Y
F	A	44	C	Y	Y	Y	Y	Y	Y	Y	Y	Y	Y	Y	Y	Y	Y
F	A	65	C	N	Y	Y	Y	Y	Y	Y	Y	Y	Y	Y	Y	Y	Y
F	A	46	C	Y	Y	Y	Y	Y	Y	Y	Y	Y	Y	Y	Y	Y	Y
F	A	70	C	Y	Y	Y	Y	Y	Y	Y	Y	Y	Y	Y	Y	Y	Y
F	A	64	C	Y	Y	Y	Y	Y	Y	Y	Y	Y	Y	Y	Y	Y	Y
F	A	45	UC	Y	Y	Y	Y	Y	Y	Y	Y	Y	N	Y	Y	Y	Y
F	A	45	UC	Y	Y	Y	Y	Y	Y	Y	N	Y	Y	Y	Y	Y	Y
F	A	53	C	Y	Y	Y	Y	Y	Y	Y	Y	Y	Y	Y	Y	Y	Y
F	A	54	C	Y	Y	Y	Y	Y	Y	Y	Y	Y	Y	Y	Y	Y	Y
F	A	66	C	Y	Y	N	Y	Y	Y	Y	Y	Y	Y	Y	Y	Y	Y
F	A	53	C	Y	N	Y	Y	Y	Y	Y	Y	Y	Y	Y	Y	Y	Y
F	A	59	C	Y	Y	Y	Y	Y	Y	Y	Y	Y	Y	Y	Y	Y	Y
F	A	56	C	Y	Y	Y	Y	Y	Y	Y	Y	Y	Y	Y	Y	Y	Y
F	A	54	C	Y	Y	Y	Y	Y	Y	Y	Y	Y	Y	Y	Y	Y	Y
F	A	53	C	Y	Y	Y	Y	Y	Y	Y	Y	Y	Y	Y	Y	Y	Y
F	A	63	C	Y	Y	Y	N	Y	Y	Y	Y	Y	Y	Y	Y	Y	Y
F	A	70	C	Y	Y	Y	Y	Y	Y	Y	Y	Y	Y	Y	Y	Y	Y
F	A	67	C	Y	Y	Y	Y	Y	Y	Y	Y	Y	Y	Y	Y	Y	Y
F	A	49	C	Y	Y	N	N	Y	Y	Y	Y	Y	Y	Y	Y	Y	Y
F	A	43	C	Y	Y	Y	Y	Y	Y	Y	Y	Y	Y	Y	Y	Y	Y
F	A	70	C	Y	Y	Y	Y	Y	Y	Y	Y	Y	Y	Y	Y	Y	Y
F	A	45	UC	Y	Y	Y	Y	Y	Y	Y	Y	Y	Y	Y	Y	Y	Y
F	A	52	C	Y	Y	Y	Y	Y	Y	Y	Y	Y	Y	Y	Y	Y	Y
F	A	65	C	Y	Y	Y	Y	Y	Y	Y	Y	Y	Y	Y	Y	Y	Y
M	A	45	C	Y	Y	Y	Y	Y	Y	Y	Y	Y	Y	Y	Y	Y	Y
M	A	52	C	Y	Y	Y	Y	Y	Y	Y	Y	Y	Y	Y	Y	Y	Y
M	A	54	C	Y	Y	Y	Y	Y	Y	Y	Y	Y	Y	Y	Y	Y	Y
M	A	72	C	Y	Y	N	Y	Y	Y	Y	Y	Y	Y	Y	Y	Y	Y
M	A	73	C	Y	Y	Y	Y	Y	Y	Y	Y	Y	Y	Y	Y	Y	Y
M	A	76	C	Y	Y	Y	Y	Y	Y	Y	Y	Y	Y	Y	Y	Y	Y
M	A	44	C	Y	Y	Y	Y	Y	Y	Y	Y	Y	Y	Y	Y	Y	Y
M	A	56	C	Y	Y	Y	Y	Y	Y	Y	Y	Y	Y	Y	Y	Y	Y
M	A	55	C	Y	Y	Y	Y	Y	Y	Y	Y	Y	Y	Y	Y	Y	Y
M	A	79	C	Y	Y	Y	N	Y	Y	Y	Y	Y	Y	Y	Y	Y	Y
M	A	55	C	Y	Y	Y	Y	Y	Y	N	Y	Y	Y	Y	Y	Y	Y
M	A	66	C	Y	Y	Y	Y	Y	Y	Y	Y	Y	Y	Y	Y	Y	Y
M	A	79	C	Y	Y	Y	Y	Y	Y	Y	Y	Y	Y	Y	Y	Y	Y
M	A	56	C	Y	Y	Y	N	Y	Y	Y	Y	Y	Y	Y	Y	Y	Y
M	A	79	C	Y	Y	Y	Y	Y	Y	Y	Y	Y	Y	Y	Y	Y	Y
M	A	56	C	Y	Y	Y	Y	Y	Y	Y	Y	Y	Y	Y	Y	Y	Y
M	A	55	C	Y	Y	Y	Y	Y	Y	Y	Y	Y	Y	Y	Y	Y	Y
M	A	46	C	Y	Y	Y	Y	Y	Y	Y	Y	Y	Y	Y	Y	Y	Y
M	A	77	C	Y	Y	Y	Y	Y	Y	Y	Y	Y	Y	Y	Y	Y	Y
M	A	72	C	Y	Y	Y	Y	Y	Y	Y	Y	Y	Y	Y	Y	Y	Y
M	A	51	C	Y	Y	Y	Y	Y	Y	Y	Y	Y	Y	Y	Y	Y	Y
M	A	73	C	Y	Y	Y	Y	Y	Y	Y	Y	Y	Y	Y	Y	Y	Y
M	A	72	C	Y	Y	Y	N	Y	Y	Y	Y	Y	Y	Y	Y	Y	Y
M	A	77	C	Y	Y	Y	Y	Y	Y	Y	Y	Y	Y	Y	Y	Y	Y
M	A	65	C	Y	Y	Y	Y	Y	Y	Y	Y	Y	Y	Y	Y	Y	Y
M	A	56	C	Y	Y	Y	Y	Y	Y	Y	Y	Y	Y	Y	Y	Y	Y
M	A	48	C	Y	Y	Y	Y	Y	Y	Y	Y	Y	Y	Y	Y	Y	Y
M	A	67	C	Y	Y	Y	Y	N	Y	Y	Y	Y	Y	Y	Y	Y	Y
M	A	47	C	Y	Y	Y	Y	Y	Y	Y	Y	Y	Y	Y	Y	Y	Y
M	A	47	C	Y	Y	Y	Y	Y	Y	Y	Y	Y	Y	Y	Y	Y	Y
M	A	70	C	Y	Y	Y	Y	Y	Y	Y	Y	Y	Y	Y	Y	Y	Y
M	A	70	C	Y	Y	Y	Y	Y	Y	Y	Y	Y	Y	Y	Y	Y	Y
M	A	70	C	Y	Y	Y	Y	Y	Y	Y	Y	Y	Y	Y	Y	Y	Y
M	A	55	C	Y	Y	Y	Y	Y	Y	Y	Y	Y	Y	Y	Y	Y	Y
M	A	71	C	Y	Y	Y	Y	Y	Y	Y	Y	Y	Y	Y	Y	Y	Y
M	A	45	UC	Y	Y	Y	N	Y	Y	Y	Y	Y	Y	Y	Y	Y	Y
M	A	66	C	Y	Y	Y	Y	Y	Y	Y	Y	Y	Y	Y	Y	Y	Y
M	A	66	C	Y	Y	Y	Y	Y	Y	Y	Y	Y	Y	Y	Y	Y	Y
M	A	45	C	Y	Y	N	Y	N	Y	Y	Y	Y	Y	Y	Y	Y	Y
M	A	67	C	Y	Y	Y	Y	Y	Y	Y	Y	Y	Y	Y	Y	Y	Y
M	A	52	C	Y	Y	Y	Y	Y	Y	Y	Y	Y	Y	Y	Y	Y	Y
M	A	66	C	Y	Y	Y	Y	Y	Y	Y	N	Y	Y	Y	Y	Y	Y
M	A	63	C	Y	Y	Y	Y	Y	Y	Y	Y	Y	Y	Y	Y	Y	Y
M	A	65	C	Y	Y	Y	Y	Y	Y	Y	Y	Y	Y	Y	Y	Y	Y
M	A	55	C	Y	Y	Y	Y	Y	Y	Y	Y	Y	Y	Y	Y	Y	Y
M	A	53	C	Y	Y	Y	Y	Y	Y	Y	Y	Y	Y	Y	Y	Y	Y
M	A	71	C	Y	Y	Y	Y	Y	Y	Y	Y	Y	Y	Y	Y	Y	Y
M	A	67	C	Y	Y	Y	Y	Y	Y	Y	Y	Y	Y	Y	Y	Y	Y
M	A	43	C	Y	Y	Y	Y	Y	Y	Y	Y	Y	Y	Y	Y	Y	Y
M	A	54	C	Y	Y	Y	Y	Y	Y	Y	Y	Y	Y	Y	Y	Y	Y
M	A	71	C	Y	Y	Y	Y	Y	Y	Y	Y	Y	Y	Y	Y	Y	Y
M	A	51	C	Y	Y	Y	Y	Y	Y	Y	Y	Y	Y	Y	Y	Y	Y
M	A	76	C	Y	Y	Y	Y	Y	Y	Y	Y	Y	Y	Y	Y	Y	Y
M	A	56	C	Y	Y	Y	Y	Y	Y	Y	Y	Y	Y	Y	Y	Y	Y
M	A	67	C	Y	Y	Y	Y	Y	Y	Y	Y	Y	Y	Y	Y	Y	Y
M	A	76	C	Y	Y	Y	Y	Y	Y	N	Y	Y	Y	Y	Y	Y	Y
M	A	53	C	Y	Y	Y	Y	Y	N	Y	Y	Y	Y	Y	Y	Y	Y
M	A	65	C	Y	Y	Y	Y	Y	Y	Y	Y	Y	Y	Y	Y	Y	Y
M	A	63	C	Y	Y	Y	Y	Y	Y	Y	Y	Y	Y	Y	Y	Y	Y
M	A	65	C	Y	Y	Y	Y	Y	Y	Y	Y	Y	Y	Y	Y	Y	Y
M	A	51	C	Y	Y	Y	Y	Y	Y	Y	Y	Y	Y	Y	Y	Y	Y
M	A	65	C	Y	Y	Y	Y	Y	Y	Y	N	Y	Y	Y	Y	Y	Y
M	A	67	C	Y	Y	Y	Y	Y	Y	Y	Y	Y	Y	Y	Y	Y	Y
M	A	66	C	Y	Y	Y	Y	Y	Y	Y	Y	Y	Y	Y	Y	Y	Y
M	A	67	C	Y	Y	Y	Y	Y	Y	Y	Y	Y	Y	Y	Y	Y	Y
M	A	62	C	Y	Y	Y	Y	Y	Y	Y	Y	Y	Y	Y	Y	Y	Y
M	A	43	C	Y	Y	Y	Y	Y	Y	Y	Y	Y	Y	Y	Y	Y	Y
M	A	80	C	Y	Y	Y	Y	Y	Y	Y	Y	Y	Y	Y	Y	Y	Y
M	A	43	C	Y	Y	Y	Y	Y	Y	Y	Y	Y	Y	Y	Y	Y	Y
M	A	65	C	Y	Y	Y	Y	Y	Y	Y	Y	Y	Y	Y	Y	Y	Y
M	A	55	C	Y	Y	Y	Y	Y	Y	Y	Y	Y	Y	Y	Y	Y	Y
M	A	52	C	Y	Y	Y	Y	Y	Y	Y	Y	Y	Y	Y	Y	Y	Y
M	A	45	C	Y	Y	Y	Y	Y	Y	Y	N	Y	Y	Y	Y	Y	Y
M	A	69	C	Y	Y	N	Y	Y	Y	Y	Y	Y	Y	Y	Y	Y	Y
M	A	57	C	Y	Y	Y	Y	Y	Y	Y	Y	Y	N	Y	Y	Y	Y
M	A	55	C	Y	Y	Y	Y	Y	Y	Y	Y	Y	Y	Y	Y	Y	Y
M	A	57	C	Y	N	Y	Y	Y	Y	Y	Y	Y	Y	Y	Y	Y	Y
M	A	80	C	Y	Y	Y	Y	Y	Y	Y	Y	Y	Y	Y	Y	Y	Y
M	A	77	C	Y	Y	Y	Y	Y	Y	Y	Y	Y	Y	Y	Y	Y	Y
M	A	46	C	Y	Y	Y	Y	Y	Y	Y	N	Y	Y	Y	Y	Y	Y
M	A	66	C	Y	Y	Y	Y	Y	Y	Y	Y	Y	Y	Y	Y	Y	Y
M	A	79	C	Y	Y	N	Y	Y	Y	Y	Y	Y	Y	Y	Y	Y	Y
M	A	66	C	Y	Y	Y	Y	Y	Y	Y	Y	Y	Y	Y	Y	Y	Y
M	A	55	C	Y	Y	Y	Y	Y	Y	Y	Y	Y	Y	Y	Y	Y	Y
M	A	66	C	Y	Y	Y	Y	Y	Y	Y	Y	Y	Y	Y	Y	Y	Y
M	A	69	C	Y	Y	Y	Y	Y	Y	Y	Y	Y	Y	Y	Y	Y	Y
M	A	56	C	Y	Y	Y	Y	Y	Y	Y	Y	Y	Y	Y	Y	Y	Y
M	A	52	C	Y	Y	Y	Y	Y	Y	Y	Y	Y	Y	Y	Y	Y	Y
M	A	73	C	Y	Y	Y	Y	Y	Y	Y	Y	Y	Y	Y	Y	Y	Y
M	A	56	C	Y	Y	N	Y	N	Y	Y	N	Y	Y	Y	Y	Y	Y
M	A	80	C	Y	Y	Y	Y	Y	Y	Y	Y	Y	Y	Y	Y	Y	Y
M	A	78	C	Y	Y	Y	Y	Y	Y	Y	Y	Y	Y	Y	Y	Y	Y
M	A	57	C	Y	Y	Y	Y	Y	Y	Y	Y	Y	Y	Y	Y	Y	Y
M	A	41	C	Y	Y	Y	Y	Y	Y	Y	Y	Y	Y	Y	Y	Y	Y
M	A	63	C	Y	Y	Y	Y	Y	Y	Y	Y	Y	Y	Y	Y	Y	Y
M	A	51	C	Y	Y	Y	Y	Y	Y	Y	Y	Y	Y	Y	Y	Y	Y
M	A	62	C	Y	Y	Y	Y	Y	Y	Y	Y	Y	Y	Y	Y	Y	Y
M	A	65	C	Y	Y	Y	Y	Y	Y	Y	Y	Y	Y	Y	Y	Y	Y
M	A	65	C	Y	Y	Y	Y	Y	Y	Y	Y	Y	Y	Y	Y	Y	Y
M	A	72	C	Y	Y	Y	Y	Y	Y	Y	Y	Y	Y	Y	Y	Y	Y
M	A	77	C	Y	Y	Y	Y	Y	Y	Y	Y	Y	Y	Y	Y	Y	Y
M	A	52	C	Y	Y	Y	Y	Y	Y	Y	Y	Y	Y	Y	Y	Y	Y
M	A	53	C	Y	Y	Y	Y	Y	Y	Y	Y	Y	Y	Y	Y	Y	Y
M	A	77	C	Y	Y	Y	Y	Y	Y	Y	Y	Y	Y	Y	Y	Y	Y
M	A	77	C	Y	Y	Y	Y	Y	Y	Y	Y	Y	Y	Y	Y	Y	Y
M	A	79	C	Y	Y	Y	Y	Y	Y	Y	Y	Y	Y	Y	Y	Y	Y
M	A	45	C	Y	Y	Y	Y	Y	Y	Y	Y	Y	Y	Y	Y	Y	Y
M	A	56	C	Y	Y	Y	Y	Y	Y	Y	Y	Y	Y	Y	Y	Y	Y
M	A	80	C	Y	Y	Y	Y	Y	Y	Y	Y	Y	Y	Y	Y	Y	Y
M	A	80	C	Y	Y	Y	Y	Y	Y	Y	Y	Y	Y	Y	Y	Y	Y
M	A	71	C	Y	Y	Y	Y	Y	Y	Y	Y	Y	Y	Y	Y	Y	Y
M	A	57	C	Y	Y	Y	Y	Y	Y	Y	Y	Y	Y	Y	Y	Y	Y
M	A	58	C	Y	Y	Y	Y	Y	Y	Y	Y	Y	Y	Y	Y	Y	Y
M	A	74	C	Y	Y	Y	Y	Y	Y	Y	Y	Y	Y	Y	Y	Y	Y
M	A	76	C	Y	Y	Y	Y	Y	Y	Y	Y	Y	Y	Y	Y	Y	Y
M	A	56	C	Y	Y	Y	Y	Y	Y	Y	Y	Y	Y	Y	Y	Y	Y
M	A	76	C	Y	Y	Y	Y	Y	Y	Y	Y	Y	Y	Y	Y	Y	Y
M	A	58	C	Y	Y	Y	Y	Y	Y	Y	Y	Y	Y	Y	Y	Y	Y
M	A	75	C	Y	Y	Y	Y	Y	Y	Y	Y	Y	Y	Y	Y	Y	Y
M	A	77	C	Y	Y	Y	Y	Y	Y	Y	Y	Y	Y	Y	Y	Y	Y
M	A	72	C	Y	Y	Y	Y	Y	Y	Y	Y	Y	Y	Y	Y	Y	Y
M	A	69	C	Y	Y	Y	Y	Y	Y	Y	Y	Y	Y	Y	Y	Y	Y
M	A	80	C	Y	Y	Y	Y	Y	N	Y	N	Y	N	Y	Y	Y	Y
M	A	66	C	Y	Y	Y	Y	Y	Y	Y	Y	Y	Y	Y	Y	Y	Y
M	A	48	C	Y	Y	Y	Y	Y	Y	Y	Y	Y	Y	Y	Y	Y	Y
M	A	80	C	Y	Y	Y	Y	Y	Y	Y	Y	Y	Y	Y	Y	Y	Y
M	A	73	C	Y	Y	Y	Y	Y	Y	Y	Y	Y	Y	Y	Y	Y	Y
M	A	70	C	Y	Y	Y	Y	Y	Y	Y	Y	Y	Y	Y	Y	Y	Y
M	A	62	C	Y	Y	Y	Y	Y	Y	Y	Y	Y	Y	Y	Y	Y	Y
M	A	54	C	Y	Y	Y	Y	Y	Y	Y	Y	Y	Y	Y	Y	Y	Y
M	A	53	C	Y	Y	Y	Y	Y	Y	Y	Y	Y	Y	Y	Y	Y	Y
M	A	54	C	Y	Y	Y	Y	Y	Y	Y	Y	Y	Y	Y	Y	Y	Y
M	A	49	C	Y	Y	Y	Y	Y	N	N	Y	Y	Y	Y	Y	Y	Y
M	A	56	C	Y	Y	Y	Y	Y	Y	Y	Y	Y	Y	Y	Y	Y	Y
M	A	72	C	Y	Y	Y	Y	Y	Y	Y	Y	Y	Y	Y	Y	Y	Y
M	A	72	C	Y	Y	Y	Y	Y	Y	Y	Y	Y	Y	Y	Y	Y	Y
M	A	72	C	Y	Y	Y	Y	Y	Y	Y	Y	Y	Y	Y	Y	Y	Y
M	A	44	C	Y	Y	Y	Y	Y	Y	Y	Y	Y	Y	Y	Y	Y	Y
M	A	57	C	Y	Y	Y	Y	Y	Y	Y	Y	Y	Y	Y	Y	Y	Y
M	A	72	C	Y	Y	Y	Y	Y	Y	Y	Y	Y	Y	Y	Y	Y	Y
M	A	58	C	Y	Y	Y	Y	Y	Y	Y	Y	Y	Y	Y	Y	Y	Y
M	A	73	C	Y	Y	Y	Y	Y	Y	Y	Y	Y	Y	Y	Y	Y	Y
M	A	76	C	Y	Y	Y	Y	Y	Y	Y	Y	Y	Y	Y	Y	Y	Y
M	A	61	C	Y	Y	Y	Y	Y	Y	Y	Y	Y	Y	Y	Y	Y	Y
M	A	80	C	Y	Y	Y	Y	Y	Y	Y	Y	Y	Y	Y	Y	Y	Y
M	A	67	C	Y	Y	Y	Y	Y	Y	Y	Y	Y	Y	Y	Y	Y	Y
M	A	67	C	Y	Y	Y	Y	Y	Y	Y	Y	Y	Y	Y	Y	Y	Y
M	A	65	C	Y	Y	Y	Y	Y	Y	Y	Y	Y	N	Y	Y	Y	Y
M	A	77	C	Y	Y	Y	Y	Y	Y	Y	Y	Y	Y	Y	Y	Y	Y
M	A	65	C	Y	Y	Y	Y	Y	Y	Y	Y	Y	Y	Y	Y	Y	Y
M	A	44	C	Y	Y	Y	Y	Y	Y	Y	Y	Y	Y	Y	Y	Y	Y
M	A	75	C	Y	Y	Y	Y	Y	Y	Y	Y	Y	Y	Y	Y	Y	Y
M	A	52	C	Y	Y	Y	Y	Y	Y	Y	Y	Y	Y	Y	Y	Y	Y
M	A	66	C	Y	Y	Y	Y	Y	Y	Y	Y	Y	Y	Y	Y	Y	Y
M	A	57	C	Y	N	Y	Y	Y	Y	Y	Y	Y	Y	Y	Y	Y	Y
M	A	71	C	Y	Y	Y	Y	Y	Y	Y	Y	Y	Y	Y	Y	Y	Y
M	A	56	C	Y	Y	Y	Y	Y	Y	Y	Y	Y	Y	Y	Y	Y	Y
M	A	64	C	Y	Y	Y	Y	Y	Y	Y	Y	Y	Y	Y	Y	Y	Y
M	A	76	C	Y	Y	Y	Y	Y	Y	Y	Y	Y	Y	Y	Y	Y	Y
M	A	73	C	Y	Y	Y	Y	Y	Y	Y	Y	Y	Y	Y	Y	Y	Y
M	A	55	C	Y	Y	Y	Y	Y	Y	Y	Y	Y	Y	Y	Y	Y	Y
M	A	57	C	Y	Y	Y	Y	Y	Y	Y	Y	Y	Y	Y	Y	Y	Y
M	A	68	C	Y	Y	Y	Y	Y	Y	Y	Y	Y	Y	Y	Y	Y	Y
M	A	72	C	Y	Y	Y	Y	Y	Y	Y	Y	Y	Y	Y	Y	Y	Y
M	A	59	C	Y	Y	Y	Y	Y	Y	Y	Y	Y	Y	Y	Y	Y	Y
M	A	51	C	Y	Y	Y	Y	Y	Y	Y	Y	Y	Y	Y	Y	Y	Y
M	A	66	C	Y	Y	Y	Y	Y	Y	Y	Y	Y	Y	Y	Y	Y	Y
M	A	80	C	Y	Y	Y	Y	Y	Y	Y	Y	Y	Y	Y	Y	Y	Y
M	A	76	C	Y	Y	N	Y	Y	Y	Y	Y	Y	Y	Y	Y	Y	Y
M	A	65	C	Y	Y	Y	Y	Y	Y	Y	Y	Y	Y	Y	Y	Y	Y
M	A	55	C	Y	Y	Y	Y	Y	Y	Y	Y	Y	Y	Y	Y	Y	Y
M	A	68	C	Y	Y	Y	Y	Y	Y	Y	Y	Y	Y	Y	Y	Y	Y
M	A	70	C	Y	Y	Y	Y	Y	Y	Y	Y	Y	Y	Y	Y	Y	Y
M	A	65	C	Y	Y	Y	Y	Y	Y	N	Y	Y	Y	Y	Y	Y	Y
M	A	71	C	Y	Y	Y	Y	Y	Y	Y	Y	Y	Y	Y	Y	Y	Y
M	A	45	C	Y	Y	Y	Y	Y	Y	Y	Y	Y	Y	Y	Y	Y	Y
M	A	66	C	Y	Y	Y	Y	Y	Y	Y	Y	Y	Y	Y	Y	Y	Y
M	A	66	C	Y	Y	Y	Y	Y	Y	Y	Y	Y	Y	Y	Y	Y	Y
M	A	68	C	Y	Y	Y	Y	Y	Y	Y	Y	Y	Y	Y	Y	Y	Y
M	A	72	C	Y	Y	Y	Y	Y	Y	Y	Y	Y	Y	Y	Y	Y	Y
M	A	54	C	Y	Y	N	Y	N	Y	Y	Y	Y	Y	Y	Y	Y	Y
M	A	64	C	Y	Y	Y	Y	Y	N	Y	Y	Y	Y	Y	Y	Y	Y
M	A	77	C	Y	Y	Y	Y	Y	Y	Y	Y	Y	Y	Y	Y	Y	Y
M	A	67	C	Y	Y	Y	Y	Y	Y	Y	Y	Y	Y	Y	Y	Y	Y
M	A	64	C	Y	Y	Y	Y	Y	Y	Y	Y	Y	N	Y	Y	Y	Y
M	A	51	C	Y	Y	Y	Y	Y	Y	Y	Y	Y	Y	Y	Y	Y	Y
M	A	73	C	Y	Y	Y	Y	Y	Y	Y	Y	Y	Y	Y	Y	Y	Y
M	A	54	C	Y	Y	Y	Y	Y	Y	Y	Y	Y	Y	Y	Y	Y	Y
M	A	65	C	Y	Y	Y	Y	Y	Y	Y	Y	Y	Y	Y	Y	Y	Y
M	A	67	C	Y	Y	Y	Y	Y	Y	Y	Y	Y	Y	Y	Y	Y	Y
M	A	59	C	Y	Y	Y	Y	Y	Y	Y	Y	Y	Y	Y	Y	Y	Y
M	A	71	C	Y	Y	Y	Y	Y	Y	Y	Y	Y	Y	Y	Y	Y	Y
M	A	66	C	Y	Y	Y	Y	Y	Y	Y	Y	Y	Y	Y	Y	Y	Y
M	A	45	C	Y	Y	Y	Y	Y	Y	Y	Y	Y	Y	Y	Y	Y	Y
M	A	58	C	Y	Y	Y	Y	Y	Y	Y	Y	Y	Y	Y	Y	Y	Y
M	A	67	C	Y	Y	Y	Y	Y	Y	Y	Y	Y	Y	Y	Y	Y	Y
M	A	58	C	Y	Y	Y	Y	Y	Y	Y	Y	Y	Y	Y	Y	Y	Y
M	A	52	C	Y	Y	Y	Y	Y	Y	Y	Y	Y	Y	Y	Y	Y	Y
M	A	65	C	Y	Y	Y	Y	Y	Y	Y	Y	Y	Y	Y	Y	Y	Y
F	NA	66	N	N	N	N	N	N	N	N	N	N	N	N	N	N	N
F	NA	56	N	N	N	N	N	N	N	N	N	N	N	N	N	N	N
F	NA	67	N	N	N	N	N	N	N	N	N	N	N	N	N	N	N
F	NA	51	N	N	N	N	N	N	N	N	N	N	N	N	N	N	N
F	NA	76	N	N	N	N	N	N	N	N	N	N	N	N	N	N	N
F	NA	67	N	N	N	N	N	N	N	N	N	N	N	N	N	N	N
F	NA	46	N	N	N	N	N	N	N	N	N	N	N	N	N	N	N
F	NA	46	N	N	N	N	N	N	N	N	N	N	N	N	N	N	N
F	NA	46	N	N	N	N	N	N	N	N	N	N	N	N	N	N	N
F	NA	57	N	N	N	N	N	N	N	N	N	N	N	N	N	N	N
F	NA	65	N	N	N	N	N	N	N	N	N	N	N	N	N	N	N
F	NA	55	N	N	N	N	N	N	N	N	N	N	N	N	N	N	N
F	NA	75	N	N	N	N	N	N	N	N	N	N	N	N	N	N	N
F	NA	77	N	N	N	N	N	N	N	N	N	N	N	N	N	N	N
F	NA	65	N	N	N	N	N	N	N	N	N	N	N	N	N	N	N
F	NA	46	N	N	N	N	N	N	N	N	N	N	N	N	N	N	N
F	NA	46	N	N	N	N	N	N	N	N	N	N	N	N	N	N	N
F	NA	46	N	N	N	N	N	N	N	N	N	N	N	N	N	N	N
F	NA	57	N	N	N	N	N	N	N	N	N	N	N	N	N	N	N
F	NA	79	N	N	N	N	N	N	N	N	N	N	N	N	N	N	N
F	NA	80	N	N	N	N	N	N	N	N	N	N	N	N	N	N	N
F	NA	56	N	N	N	N	N	N	N	N	N	N	N	N	N	N	N
F	NA	67	N	N	N	N	N	N	N	N	N	N	N	N	N	N	N
F	NA	77	N	N	N	N	N	N	N	N	N	N	N	N	N	N	N
F	NA	65	N	N	N	N	N	N	N	N	N	N	N	N	N	N	N
F	NA	62	N	N	N	N	N	N	N	N	N	N	N	N	N	N	N
F	NA	62	N	N	N	N	N	N	N	N	N	N	N	N	N	N	N
F	NA	62	N	N	N	N	N	N	N	N	N	N	N	N	N	N	N
F	NA	62	N	N	N	N	N	N	N	N	N	N	N	N	N	N	N
F	NA	62	N	N	N	N	N	N	N	N	N	N	N	N	N	N	N
F	NA	62	N	N	N	N	N	N	N	N	N	N	N	N	N	N	N
F	NA	66	N	N	N	N	N	N	N	N	N	N	N	N	N	N	N
F	NA	67	N	N	N	N	N	N	N	N	N	N	N	N	N	N	N
F	NA	61	N	N	N	N	N	N	N	N	N	N	N	N	N	N	N
F	NA	63	N	N	N	N	N	N	N	N	N	N	N	N	N	N	N
F	NA	67	N	N	N	N	N	N	N	N	N	N	N	N	N	N	N
F	NA	65	N	N	N	N	N	N	N	N	N	N	N	N	N	N	N
F	NA	62	N	N	N	N	N	N	N	N	N	N	N	N	N	N	N
F	NA	55	N	N	N	N	N	N	N	N	N	N	N	N	N	N	N
F	NA	72	N	N	N	N	N	N	N	N	N	N	N	N	N	N	N
F	NA	72	N	N	N	N	N	N	N	N	N	N	N	N	N	N	N
F	NA	72	N	N	N	N	N	N	N	N	N	N	N	N	N	N	N
F	NA	72	N	N	N	N	N	N	N	N	N	N	N	N	N	N	N
F	NA	72	N	N	N	N	N	N	N	N	N	N	N	N	N	N	N
F	NA	72	N	N	N	N	N	N	N	N	N	N	N	N	N	N	N
F	NA	72	N	N	N	N	N	N	N	N	N	N	N	N	N	N	N
F	NA	72	N	N	N	N	N	N	N	N	N	N	N	N	N	N	N
F	NA	72	N	N	N	N	N	N	N	N	N	N	N	N	N	N	N
F	NA	72	N	N	N	N	N	N	N	N	N	N	N	N	N	N	N
F	NA	65	N	N	N	N	N	N	N	N	N	N	N	N	N	N	N
F	NA	63	N	N	N	N	N	N	N	N	N	N	N	N	N	N	N
F	NA	62	N	N	N	N	N	N	N	N	N	N	N	N	N	N	N
F	NA	67	N	N	N	N	N	N	N	N	N	N	N	N	N	N	N
F	NA	65	N	N	N	N	N	N	N	N	N	N	N	N	N	N	N
F	NA	55	N	N	N	N	N	N	N	N	N	N	N	N	N	N	N
F	NA	68	N	N	N	N	N	N	N	N	N	N	N	N	N	N	N
F	NA	61	N	N	N	N	N	N	N	N	N	N	N	N	N	N	N
F	NA	65	N	N	N	N	N	N	N	N	N	N	N	N	N	N	N
F	NA	49	N	N	N	N	N	N	N	N	N	N	N	N	N	N	N
F	NA	66	N	N	N	N	N	N	N	N	N	N	N	N	N	N	N
F	NA	63	N	N	N	N	N	N	N	N	N	N	N	N	N	N	N
F	NA	62	N	N	N	N	N	N	N	N	N	N	N	N	N	N	N
F	NA	65	N	N	N	N	N	N	N	N	N	N	N	N	N	N	N
F	NA	63	N	N	N	N	N	N	N	N	N	N	N	N	N	N	N
F	NA	62	N	N	N	N	N	N	N	N	N	N	N	N	N	N	N
F	NA	49	N	N	N	N	N	N	N	N	N	N	N	N	N	N	N
F	NA	67	N	N	N	N	N	N	N	N	N	N	N	N	N	N	N
F	NA	65	N	N	N	N	N	N	N	N	N	N	N	N	N	N	N
F	NA	63	Y	N	N	N	N	N	N	N	N	N	N	Y	N	N	N
F	NA	62	N	N	N	N	N	N	N	N	N	N	N	N	N	N	N
F	NA	67	N	N	N	N	N	N	N	N	N	N	N	N	N	N	N
F	NA	65	N	N	N	N	N	N	N	N	N	N	N	N	N	N	N
F	NA	65	N	N	N	N	N	N	N	N	N	N	N	Y	N	N	N
F	NA	65	N	N	N	N	N	N	Y	N	N	N	N	N	N	N	N
F	NA	66	N	N	N	N	N	N	N	N	N	N	N	N	N	N	N
F	NA	50	N	N	N	N	N	N	N	N	N	N	N	N	N	N	N
F	NA	50	N	N	N	N	N	N	N	N	N	N	N	N	N	N	N
F	NA	50	N	N	N	N	N	N	N	N	N	N	N	Y	N	N	N
F	NA	50	N	N	N	N	N	N	N	N	N	N	N	N	N	N	N
F	NA	50	N	N	N	N	N	N	Y	N	N	N	N	N	N	N	N
F	NA	50	N	N	N	N	N	N	N	N	N	N	N	N	N	N	N
F	NA	53	N	N	N	N	N	N	N	N	N	N	N	N	N	N	N
F	NA	53	N	N	N	N	N	N	N	N	N	N	N	N	N	N	N
F	NA	53	N	N	N	N	N	N	N	N	N	N	N	N	N	N	N
F	NA	53	N	N	N	N	N	N	Y	N	N	N	N	N	N	N	N
F	NA	53	N	N	N	N	N	N	N	N	N	N	N	Y	N	N	N
F	NA	53	N	N	N	N	N	N	N	N	N	N	N	N	N	N	N
F	NA	53	N	N	N	N	N	N	N	N	N	N	N	N	N	N	N
F	NA	53	N	N	N	N	N	N	Y	N	N	N	N	N	N	N	N
F	NA	53	N	N	N	N	N	N	N	N	N	N	N	N	N	N	N
F	NA	53	N	N	N	N	N	N	N	N	N	N	N	N	N	N	N
F	NA	59	N	N	N	N	N	N	Y	N	N	N	N	N	N	N	N
F	NA	59	N	N	N	N	N	N	N	N	N	N	N	N	N	N	N
F	NA	59	N	N	N	N	N	N	N	N	N	N	N	N	N	N	N
F	NA	59	N	N	N	N	N	N	N	N	N	N	N	N	N	N	N
F	NA	59	N	N	N	N	N	N	N	N	N	N	N	Y	N	N	N
F	NA	59	N	N	N	N	N	N	N	N	N	N	N	N	N	N	N
F	NA	67	N	N	N	N	N	N	N	N	N	N	N	N	N	N	N
F	NA	55	N	N	N	N	N	N	N	N	N	N	N	N	N	N	N
F	NA	60	N	N	N	N	N	N	N	N	N	N	N	N	N	N	N
F	NA	60	N	N	N	N	N	N	N	N	N	N	N	N	N	N	N
F	NA	51	N	N	N	N	N	N	N	N	N	N	N	N	N	N	N
F	NA	66	N	N	N	N	N	N	N	N	N	N	N	N	N	N	N
F	NA	56	N	N	N	N	N	N	N	N	N	N	N	N	N	N	N
F	NA	51	N	N	N	N	N	N	N	N	N	N	N	N	N	N	N
F	NA	51	N	N	N	N	N	N	N	N	N	N	N	N	N	N	N
F	NA	65	N	N	N	N	N	N	N	N	N	N	N	N	N	N	N
F	NA	63	N	N	N	N	N	N	N	N	N	N	N	N	N	N	N
F	NA	62	N	N	N	N	N	N	N	N	N	N	N	N	N	N	N
F	NA	67	N	N	N	N	N	N	N	N	N	N	N	N	N	N	N
F	NA	67	N	N	N	N	N	N	N	N	N	N	N	N	N	N	N
F	NA	55	N	N	N	N	N	N	N	N	N	N	N	N	N	N	N
F	NA	49	N	N	N	N	N	N	N	N	N	N	N	N	N	N	N
F	NA	59	N	N	N	N	N	N	N	N	N	N	N	N	N	N	N
F	NA	67	N	N	N	N	N	N	N	N	N	N	N	N	N	N	N
F	NA	65	N	N	N	N	N	N	N	N	N	N	N	N	N	N	N
F	NA	59	N	N	N	N	N	N	N	N	N	N	N	N	N	N	N
F	NA	65	N	N	N	N	N	N	N	N	N	N	N	N	N	N	N
F	NA	59	N	N	N	N	N	N	N	N	N	N	N	N	N	N	N
F	NA	66	N	N	N	N	N	N	N	N	N	N	N	N	N	N	N
F	NA	63	N	N	N	N	N	N	N	N	N	N	N	N	N	N	N
F	NA	59	N	N	N	N	N	N	N	N	N	N	N	N	N	N	N
F	NA	46	N	N	N	N	N	N	N	N	N	N	N	N	N	N	N
F	NA	58	N	N	N	N	N	N	N	N	N	N	N	N	N	N	N
F	NA	46	N	N	N	N	N	N	N	N	N	N	N	N	N	N	N
F	NA	58	N	N	N	N	N	N	N	N	N	N	N	N	N	N	N
F	NA	46	N	N	N	N	N	N	N	N	N	N	N	N	N	N	N
F	NA	58	N	N	N	N	N	N	N	N	N	N	N	N	N	N	N
F	NA	46	N	N	N	N	N	N	N	N	N	N	N	N	N	N	N
F	NA	58	N	N	N	N	N	N	N	N	N	N	N	N	N	N	N
F	NA	67	N	N	N	N	N	N	N	N	N	N	N	N	N	N	N
F	NA	46	N	N	N	N	N	N	N	N	N	N	N	N	N	N	N
F	NA	58	N	N	N	N	N	N	N	Y	N	N	N	N	N	N	N
F	NA	46	N	N	N	N	N	N	N	N	N	N	N	N	N	N	N
F	NA	58	N	N	N	N	N	N	N	N	N	N	N	N	N	N	N
F	NA	46	N	N	N	N	N	N	N	N	N	N	N	N	N	N	N
F	NA	58	N	N	N	N	N	N	N	N	N	N	N	N	N	N	N
F	NA	46	N	N	N	N	N	N	N	N	N	N	N	N	N	N	N
F	NA	57	N	N	N	N	N	N	N	N	N	N	N	N	N	N	N
F	NA	67	N	N	N	N	N	N	N	N	N	N	N	N	N	N	N
F	NA	46	N	N	N	N	N	N	N	N	N	N	N	N	N	N	N
F	NA	46	N	N	N	N	N	N	N	N	N	N	N	N	N	N	N
F	NA	67	N	N	N	N	N	N	N	N	N	N	N	N	N	N	N
F	NA	46	N	N	N	N	N	N	N	N	N	N	N	N	N	N	N
F	NA	46	N	N	N	N	N	N	N	Y	N	N	N	N	N	N	N
F	NA	66	N	N	N	N	N	N	N	N	N	N	N	N	N	N	N
F	NA	46	N	N	N	N	N	N	N	N	N	N	N	N	N	N	N
F	NA	57	N	N	N	N	N	N	N	N	N	N	N	N	N	N	N
F	NA	65	N	N	N	N	N	N	N	N	N	N	N	N	N	N	N
F	NA	46	N	N	N	N	N	N	N	Y	N	N	N	N	N	N	N
F	NA	46	N	N	N	N	N	N	N	Y	N	N	N	N	N	N	N
F	NA	46	N	N	N	N	N	N	N	N	N	N	N	N	N	N	N
F	NA	66	N	N	N	N	N	N	N	N	N	N	N	N	N	N	N
F	NA	66	N	N	N	N	N	N	N	N	N	N	N	N	N	N	N
F	NA	77	N	N	N	N	N	N	N	N	N	N	N	N	N	N	N
F	NA	66	N	N	N	N	N	N	N	N	N	N	N	N	N	N	N
F	NA	56	N	N	N	N	N	N	N	N	N	N	N	N	N	N	N
F	NA	51	N	N	N	N	N	N	N	N	N	N	N	N	N	N	N
F	NA	51	N	N	N	N	N	N	N	N	N	N	N	N	N	N	N
F	NA	65	N	N	N	N	N	N	N	N	N	N	N	N	N	N	N
F	NA	63	N	N	N	N	N	N	N	N	N	N	N	N	N	N	N
F	NA	46	N	N	N	N	N	N	N	N	N	N	N	N	N	N	N
F	NA	62	N	N	N	N	N	N	N	N	N	N	N	N	N	N	N
F	NA	67	N	N	N	N	N	N	N	N	N	N	N	N	N	N	N
F	NA	65	N	N	N	N	N	N	N	N	N	N	N	N	N	N	N
F	NA	65	N	N	N	Y	N	N	N	N	N	N	N	N	N	N	N
F	NA	55	N	N	N	N	N	N	N	N	N	N	N	N	N	N	N
F	NA	49	N	N	N	N	N	N	N	N	N	N	N	N	N	N	N
F	NA	65	N	N	N	N	N	N	N	N	N	N	N	N	N	N	N
F	NA	65	N	N	N	N	N	N	N	N	N	N	N	N	N	N	N
F	NA	66	N	N	N	N	N	N	N	N	N	N	N	N	N	N	N
F	NA	47	N	N	N	N	N	N	N	N	N	N	N	N	N	N	N
F	NA	47	N	N	N	N	N	N	N	N	N	N	N	N	N	N	N
F	NA	47	N	N	N	N	N	N	N	N	N	N	N	N	N	N	N
F	NA	66	N	N	N	N	N	N	N	N	N	N	N	N	N	N	N
F	NA	66	N	N	N	N	N	N	N	N	N	N	N	N	N	N	N
F	NA	77	N	N	N	N	N	N	N	N	N	N	N	N	N	N	N
F	NA	51	N	N	N	N	N	N	N	N	N	N	N	N	N	N	N
F	NA	65	N	N	N	N	N	N	N	N	N	N	N	N	N	N	N
F	NA	65	N	N	N	N	N	N	N	N	N	N	N	N	N	N	N
F	NA	56	N	N	N	N	N	N	N	N	N	N	N	N	N	N	N
F	NA	62	N	N	N	N	N	N	N	N	N	N	N	N	N	N	N
F	NA	67	N	N	N	N	N	N	N	N	N	N	N	N	N	N	N
F	NA	63	N	N	N	N	N	N	N	N	N	N	N	N	N	N	N
F	NA	49	N	N	N	Y	N	N	N	N	N	N	Y	N	N	N	N
F	NA	45	N	N	N	N	N	N	N	N	N	N	N	N	N	N	N
F	NA	49	N	N	N	N	N	N	N	N	N	N	N	N	N	N	N
F	NA	55	N	N	N	N	N	N	N	N	N	N	N	N	N	N	N
F	NA	67	N	N	N	N	N	N	N	N	N	N	N	N	N	N	N
F	NA	67	N	N	N	N	N	N	N	N	N	N	N	N	N	N	N
F	NA	62	N	N	N	N	N	N	N	N	N	N	N	N	N	N	N
F	NA	67	N	N	N	N	N	N	N	N	N	N	N	N	N	N	N
F	NA	76	N	N	N	N	N	N	N	N	N	N	N	N	N	N	N
F	NA	66	N	N	N	N	N	N	N	N	N	N	N	N	N	N	N
F	NA	45	N	N	N	N	N	N	N	N	N	N	N	N	N	N	N
F	NA	55	N	N	N	N	N	N	N	N	N	N	N	N	N	N	N
F	NA	65	N	N	N	N	N	N	N	N	N	N	N	N	N	N	N
F	NA	65	N	N	N	N	N	N	N	N	N	N	N	N	N	N	N
F	NA	51	N	N	N	N	N	N	N	N	N	N	N	N	N	N	N
F	NA	65	N	N	N	N	N	N	N	N	N	N	N	N	N	N	N
F	NA	49	N	N	N	N	N	N	N	N	N	N	N	N	N	N	N
F	NA	63	N	N	N	N	N	N	N	N	N	N	N	N	N	N	N
F	NA	62	N	N	N	N	N	N	N	N	N	N	N	N	N	N	N
M	NA	65	N	N	N	N	N	N	N	N	N	N	N	N	N	N	N
M	NA	65	N	N	N	N	N	N	N	N	N	N	N	N	N	N	N
M	NA	43	N	N	N	N	N	N	N	N	N	N	N	N	N	N	N
M	NA	65	N	N	N	N	N	N	N	N	N	N	N	N	N	N	N
M	NA	66	N	N	N	N	N	N	N	N	N	N	N	N	N	N	N
M	NA	66	N	N	N	N	N	N	N	N	N	N	N	N	N	N	N
M	NA	45	N	N	N	N	N	N	N	N	N	N	N	N	N	N	N
M	NA	65	N	N	N	N	N	N	N	N	N	N	N	N	N	N	N
M	NA	55	N	N	N	N	N	N	N	N	N	N	N	N	N	N	N
M	NA	54	N	N	N	N	N	N	N	N	N	N	N	N	N	N	N
M	NA	53	N	N	N	N	N	N	N	N	N	N	N	N	N	N	N
M	NA	56	N	N	N	N	N	N	N	N	N	N	N	N	N	N	N
M	NA	55	N	N	N	N	N	N	N	N	N	N	N	N	N	N	N
M	NA	45	N	N	N	N	N	N	N	N	N	N	N	N	N	N	N
M	NA	43	N	N	N	N	N	N	N	N	N	N	N	N	N	N	N
M	NA	43	N	N	N	N	N	N	N	N	N	N	N	N	N	N	N
M	NA	42	N	N	N	N	N	N	N	N	N	N	N	N	N	N	N
M	NA	41	N	N	N	N	N	N	N	N	N	N	N	N	N	N	N
M	NA	45	N	N	N	N	N	N	N	N	N	N	N	N	N	N	N
M	NA	50	N	N	N	N	N	N	N	N	N	N	N	N	N	N	N
M	NA	67	N	N	N	N	N	N	N	N	N	N	N	N	N	N	N
M	NA	52	N	N	N	N	N	N	N	N	N	N	N	N	N	N	N
M	NA	52	N	N	N	N	N	N	N	N	N	N	N	N	N	N	N
M	NA	51	N	N	N	N	N	N	N	N	N	N	N	N	N	N	N
M	NA	66	N	N	N	N	N	N	N	N	N	N	N	N	N	N	N
M	NA	66	N	N	N	N	N	N	N	N	N	N	N	N	N	N	N
M	NA	62	N	N	N	N	Y	N	N	N	N	N	N	N	N	N	N
M	NA	77	N	N	N	N	N	N	N	N	N	N	N	N	N	N	N
M	NA	66	N	N	N	N	N	N	N	N	N	N	N	N	N	N	N
M	NA	56	N	N	N	N	N	N	N	N	N	N	N	N	N	N	N
M	NA	51	N	N	N	N	N	N	N	N	N	N	N	N	N	N	N
M	NA	51	N	N	N	N	N	N	N	N	N	N	N	N	N	N	N
M	NA	65	N	N	N	N	N	N	N	N	N	N	N	N	N	N	N
M	NA	63	N	N	N	N	N	N	N	N	N	N	N	N	N	N	N
M	NA	62	N	N	N	N	N	N	N	N	N	N	N	N	N	N	N
M	NA	67	N	N	N	N	N	N	N	N	N	N	N	N	N	N	N
M	NA	45	N	N	N	N	N	N	N	N	N	N	N	N	N	N	N
M	NA	46	N	N	N	N	N	N	N	N	N	N	N	N	N	N	N
M	NA	46	N	N	N	N	N	N	N	N	N	N	N	N	N	N	N
M	NA	56	N	N	N	N	N	N	N	N	N	N	N	N	N	N	N
M	NA	47	N	N	N	N	N	N	N	N	N	N	N	N	N	N	N
M	NA	73	N	N	N	N	N	N	N	N	N	N	N	N	N	N	N
M	NA	71	N	N	N	N	N	N	N	N	N	N	N	N	N	N	N
M	NA	72	N	N	N	N	N	N	N	N	N	N	N	N	N	N	N
M	NA	72	N	N	N	N	N	N	N	N	N	N	N	N	N	N	N
M	NA	80	N	N	N	N	N	N	N	N	N	N	N	N	N	N	N
M	NA	80	N	N	N	N	N	N	N	N	N	N	N	N	N	N	N
M	NA	68	N	N	N	N	N	N	N	N	N	N	N	N	N	N	N
M	NA	67	N	N	N	N	N	N	N	N	N	N	N	N	N	N	N
M	NA	66	N	N	N	N	N	N	N	N	N	N	N	N	N	N	N
M	NA	65	N	N	N	N	N	N	N	N	N	N	N	N	N	N	N
M	NA	64	N	N	N	N	N	N	N	N	N	N	N	N	N	N	N
M	NA	63	N	N	N	N	N	N	N	N	N	N	N	N	N	N	N
M	NA	62	N	N	N	N	N	N	N	N	N	N	N	N	N	N	N
M	NA	61	N	N	N	N	N	N	N	N	N	N	N	N	N	N	N
M	NA	60	N	N	N	N	N	N	N	N	N	N	N	N	N	N	N
M	NA	59	N	N	N	N	N	N	N	N	N	N	N	N	N	N	N
M	NA	58	N	N	N	N	N	N	N	N	N	N	N	N	N	N	N
M	NA	57	N	N	N	N	N	N	N	N	N	N	N	N	N	N	N
M	NA	56	N	N	N	N	N	N	N	N	N	N	N	N	N	N	N
M	NA	55	N	N	N	N	N	N	N	N	N	N	N	N	N	N	N
M	NA	54	N	N	N	N	N	N	N	N	N	N	N	N	N	N	N
M	NA	53	N	N	N	N	N	N	N	N	N	N	N	N	N	N	N
M	NA	53	N	N	N	N	N	N	N	N	N	N	N	N	N	N	N
M	NA	65	N	N	N	N	N	N	N	N	N	N	N	N	N	N	N
M	NA	55	N	N	N	N	N	N	N	N	N	N	N	N	N	N	N
M	NA	49	N	N	N	N	N	N	N	N	N	N	N	N	N	N	N
M	NA	65	N	N	N	N	N	N	N	N	N	N	N	N	N	N	N
M	NA	65	N	N	N	N	N	N	N	N	N	N	N	N	N	N	N
M	NA	66	N	N	N	N	N	N	N	N	N	N	N	N	N	N	N
M	NA	66	N	N	N	N	N	N	N	N	N	N	N	N	N	N	N
M	NA	53	N	N	N	N	N	N	N	N	N	N	N	N	N	N	N
M	NA	53	N	N	N	N	N	N	N	N	N	N	N	N	N	N	N
M	NA	66	N	N	N	N	N	N	N	N	N	N	N	N	N	N	N
M	NA	66	N	N	N	N	N	N	N	N	N	N	N	N	N	N	N
M	NA	53	N	N	N	N	N	N	N	N	N	N	N	N	N	N	N
M	NA	53	N	N	N	N	N	N	N	N	N	N	N	N	N	N	N
M	NA	53	N	N	N	N	N	N	N	N	N	N	N	N	N	N	N
M	NA	53	N	N	N	N	N	N	N	N	N	N	N	N	N	N	N
M	NA	55	N	N	N	N	N	N	N	N	N	N	N	N	N	N	N
M	NA	56	N	N	N	N	N	N	N	N	N	N	N	N	N	N	N
M	NA	68	N	N	N	N	N	N	N	N	N	N	N	N	N	N	N
M	NA	63	N	N	N	N	N	N	N	N	N	N	N	N	N	N	N
M	NA	52	N	N	N	N	N	N	N	N	N	N	N	N	N	N	N
M	NA	45	N	N	N	N	N	N	N	N	N	N	N	N	N	N	N
M	NA	63	N	N	N	N	N	N	N	N	N	N	N	N	N	N	N
M	NA	51	N	N	N	N	N	N	N	N	N	N	N	N	N	N	N
M	NA	70	N	N	N	N	N	N	N	N	N	N	N	N	N	N	N
M	NA	65	N	N	N	N	N	N	N	N	N	N	N	N	N	N	N
M	NA	51	N	N	N	N	N	N	N	N	N	N	N	N	N	N	N
M	NA	62	N	N	N	N	N	N	N	N	N	N	N	N	N	N	N
M	NA	68	N	N	N	N	N	N	N	N	N	N	N	N	N	N	N
M	NA	51	N	N	N	N	N	N	N	N	N	N	N	N	N	N	N
M	NA	72	N	N	N	N	N	N	N	N	N	N	N	N	N	N	N
M	NA	65	N	N	N	N	N	N	N	N	N	N	N	N	N	N	N
M	NA	66	N	N	N	N	N	N	N	N	N	N	N	N	N	N	N
M	NA	67	N	N	N	N	Y	N	N	N	N	N	N	N	N	Y	N
M	NA	77	N	N	N	N	N	N	N	N	N	N	N	N	N	N	N
M	NA	66	N	N	N	N	N	N	N	N	N	N	N	N	N	N	N
M	NA	75	N	N	N	N	N	N	N	N	N	N	N	N	N	N	N
M	NA	43	N	N	N	N	N	N	N	N	N	N	N	N	N	N	N
M	NA	63	N	N	N	N	N	N	N	N	N	N	N	N	N	N	N
M	NA	66	N	N	N	N	N	N	N	N	N	N	N	N	N	N	N
M	NA	66	N	N	N	N	N	N	N	N	N	N	N	N	N	N	N
M	NA	66	N	N	N	N	N	N	N	N	N	N	N	N	N	N	N
M	NA	66	N	N	N	N	N	N	N	N	N	N	N	N	N	N	N
M	NA	66	N	N	N	N	N	N	N	N	N	N	N	N	N	N	N
M	NA	63	N	N	N	N	N	N	N	N	N	N	N	N	N	N	N
M	NA	63	N	N	N	N	N	N	N	N	N	N	N	N	N	N	N
M	NA	63	N	N	N	N	N	N	N	N	N	N	N	N	N	N	N
M	NA	63	N	N	N	N	N	N	N	N	N	N	N	N	N	N	N
M	NA	49	N	N	N	N	N	N	N	N	N	N	N	N	N	N	N
M	NA	65	N	N	N	N	N	N	N	N	N	N	N	N	N	N	N
M	NA	55	N	N	N	N	N	N	N	N	N	N	N	N	N	N	N
M	NA	67	N	N	N	N	N	N	N	N	N	N	N	N	N	N	N
M	NA	63	N	N	N	N	N	N	N	N	N	N	N	N	N	N	N
M	NA	65	N	N	N	N	N	N	N	N	N	N	N	N	N	N	N
M	NA	67	N	N	N	N	N	N	N	N	N	N	N	N	N	N	N
M	NA	67	N	N	N	N	N	N	N	N	N	N	N	N	N	N	N
M	NA	65	N	N	N	N	N	N	N	N	N	N	N	N	N	N	N
M	NA	56	N	N	N	N	N	N	N	N	N	N	N	N	N	N	N
M	NA	51	N	N	N	N	N	N	N	N	N	N	N	N	N	N	N
M	NA	45	N	N	N	N	N	N	N	N	N	N	N	N	N	N	N
M	NA	51	N	N	N	N	N	N	N	N	N	N	N	N	N	N	N
M	NA	66	N	N	N	N	N	N	N	N	N	N	N	N	N	N	N
M	NA	63	N	N	N	N	N	N	N	N	N	N	N	N	N	N	N
M	NA	67	N	N	N	N	N	N	N	N	N	N	N	N	N	N	N
M	NA	67	N	N	N	N	N	N	N	N	N	N	N	N	N	N	N
M	NA	67	N	N	N	N	N	N	N	N	N	N	N	N	N	N	N
M	NA	63	N	N	N	N	N	N	N	N	N	N	N	N	N	N	N
M	NA	63	N	N	N	N	N	N	N	N	N	N	N	N	N	N	N
M	NA	66	N	N	N	N	N	N	N	N	N	N	N	N	N	N	N
M	NA	66	N	N	N	N	N	N	N	N	N	N	N	N	N	N	N
M	NA	72	N	N	N	N	N	N	N	N	N	N	N	N	N	N	N
M	NA	56	N	N	N	N	N	N	N	N	N	N	N	N	N	N	N
M	NA	73	N	N	N	N	N	N	N	N	N	N	N	N	N	N	N
M	NA	63	N	N	N	N	N	N	N	N	N	N	N	N	N	N	N
M	NA	73	N	N	N	N	N	N	N	N	N	N	N	N	N	N	N
M	NA	65	N	N	N	N	N	N	N	N	N	N	N	N	N	N	N
M	NA	65	N	N	N	N	N	N	N	N	N	N	N	N	N	N	N
M	NA	63	N	N	N	N	N	N	N	N	N	N	N	N	N	N	N
M	NA	71	N	N	N	N	N	N	N	N	N	N	N	N	N	N	N
M	NA	72	N	N	N	N	N	N	N	N	N	N	N	N	N	N	N
M	NA	68	N	N	N	N	N	N	N	N	N	N	N	N	N	N	N
M	NA	68	N	N	N	N	N	N	N	N	N	N	N	N	N	N	N
M	NA	63	N	N	N	N	N	N	N	N	N	N	N	N	N	N	N
M	NA	68	N	N	N	N	N	N	N	N	N	N	N	N	N	N	N
M	NA	68	N	N	N	N	N	N	N	N	N	N	N	N	N	N	N
M	NA	68	N	N	N	N	N	N	N	N	N	N	N	N	N	N	N
M	NA	68	N	N	N	N	N	N	N	N	N	N	N	N	N	N	N
M	NA	68	N	N	N	N	N	N	N	N	N	N	N	N	N	N	N
M	NA	68	N	N	N	N	N	N	N	N	N	N	N	N	N	N	N
M	NA	68	N	N	N	N	N	N	N	N	N	N	N	N	N	N	N
M	NA	51	N	N	N	N	N	N	N	N	N	N	N	N	N	N	N
M	NA	68	N	N	N	N	N	N	N	N	N	N	N	N	N	N	N
M	NA	67	N	N	N	N	N	N	N	N	N	N	N	N	N	N	N
M	NA	52	N	N	N	N	N	N	N	N	N	N	N	N	N	N	N
M	NA	52	N	N	N	N	N	Y	N	Y	N	N	Y	N	N	N	N
M	NA	51	N	N	N	N	N	N	N	N	N	N	N	N	N	N	N
M	NA	45	N	N	N	N	N	N	N	N	N	N	N	N	N	N	N
M	NA	66	N	N	N	N	N	N	N	N	N	N	N	N	N	N	N
M	NA	66	N	N	N	N	N	N	N	N	N	N	N	N	N	N	N
M	NA	63	N	N	N	N	N	N	N	N	N	N	N	N	N	N	N
M	NA	77	N	N	N	N	N	N	N	N	N	N	N	N	N	N	N
M	NA	66	N	N	N	N	N	N	N	N	N	N	N	N	N	N	N
M	NA	56	N	N	N	N	N	N	N	N	N	N	N	N	N	N	N
M	NA	51	N	N	N	N	N	N	N	N	N	N	N	N	N	N	N
M	NA	51	N	N	N	N	N	N	N	N	N	N	N	N	N	N	N
M	NA	56	N	N	N	N	N	N	N	N	N	N	N	N	N	N	N
M	NA	65	N	N	N	N	N	N	N	N	N	N	N	N	N	N	N
M	NA	63	N	N	N	N	N	N	N	N	N	N	N	N	N	N	N
M	NA	62	N	N	N	N	N	N	N	N	N	N	N	N	N	N	N
M	NA	67	N	N	N	N	N	N	N	N	N	N	N	N	N	N	N
M	NA	65	N	N	N	N	N	N	N	N	N	N	N	N	N	N	N
M	NA	55	N	N	N	N	N	N	N	N	N	N	N	N	N	N	N
M	NA	49	N	N	N	N	N	N	N	N	N	N	N	N	N	N	N
M	NA	65	N	N	N	N	N	N	N	N	N	N	N	N	N	N	N
M	NA	52	N	N	N	N	N	N	N	N	N	N	N	N	N	N	N
M	NA	65	N	N	N	N	N	N	N	N	N	N	N	N	N	N	N
M	NA	72	N	N	N	N	N	N	N	N	N	N	N	N	N	N	N
M	NA	51	N	N	N	N	N	N	N	N	N	N	N	N	N	N	N
M	NA	66	N	N	N	N	N	N	N	N	N	N	N	N	N	N	N
M	NA	66	N	N	N	N	N	N	N	N	N	N	N	N	N	N	N
M	NA	70	N	N	N	N	N	N	N	N	N	N	N	N	N	N	N
M	NA	67	N	N	N	N	N	N	N	N	N	N	N	N	N	N	N
M	NA	56	N	N	N	N	N	N	N	N	N	N	N	N	N	N	N
M	NA	52	N	N	N	N	N	N	N	N	N	N	N	N	N	N	N
M	NA	52	N	N	N	N	N	N	N	N	N	N	N	N	N	N	N
M	NA	52	N	N	N	N	N	N	N	N	N	N	N	N	N	N	N
M	NA	76	N	N	N	N	N	N	N	N	N	N	N	N	N	N	N
M	NA	51	N	N	N	N	N	N	N	N	N	N	N	N	N	N	N
M	NA	66	N	N	N	N	N	N	N	N	N	N	N	N	N	N	N
M	NA	66	N	N	N	N	N	N	N	N	N	N	N	N	N	N	N
M	NA	77	N	N	N	N	N	N	N	N	N	N	N	N	N	N	N
M	NA	63	N	N	N	N	N	N	N	N	N	N	N	N	N	N	N
M	NA	56	N	N	N	N	N	N	N	N	N	N	N	N	N	N	N
M	NA	66	N	N	N	N	N	N	N	N	N	N	N	N	N	N	N
M	NA	51	N	N	N	N	N	N	N	N	N	N	N	N	N	N	N
M	NA	66	N	N	N	N	N	N	N	N	N	N	N	N	N	N	N
M	NA	51	N	N	Y	N	N	N	N	N	N	N	N	N	N	N	N
M	NA	43	N	N	N	N	N	N	N	N	N	N	N	N	N	N	N
M	NA	77	N	N	N	N	N	N	N	N	N	N	N	N	N	N	N
M	NA	68	N	N	N	N	N	N	N	N	N	N	N	N	N	N	N
M	NA	56	N	N	N	N	N	N	N	N	N	N	N	N	N	N	N
M	NA	51	N	N	N	N	N	N	N	N	N	N	N	N	N	N	N
M	NA	52	N	N	N	N	N	N	N	N	N	N	N	N	N	N	N
M	NA	51	N	N	N	N	N	N	N	N	N	N	N	N	N	N	N
M	NA	65	N	N	N	N	N	N	N	N	N	N	N	N	N	N	N
M	NA	63	N	N	N	N	N	N	N	N	N	N	N	N	N	N	N
M	NA	62	N	N	N	N	N	N	N	N	N	N	N	N	N	N	N
M	NA	67	N	N	N	N	N	N	N	N	N	N	N	N	N	N	N
M	NA	62	N	N	N	N	N	N	N	N	N	N	N	N	N	N	N
M	NA	65	N	N	N	N	N	N	N	N	N	N	N	N	N	N	N
M	NA	55	N	N	N	N	N	N	N	N	N	N	N	N	N	N	N
M	NA	49	N	N	N	N	N	N	N	N	N	N	N	N	N	N	N
M	NA	52	N	N	N	N	N	N	N	N	N	N	N	N	N	N	N
M	NA	63	N	N	N	N	N	N	N	N	N	N	N	N	N	N	N
M	NA	63	N	N	N	N	N	N	N	N	N	N	N	N	N	N	N
M	NA	63	N	N	N	N	N	N	N	N	N	N	N	N	N	N	N
M	NA	63	N	N	N	N	N	N	N	N	N	N	N	N	N	N	N
M	NA	43	N	N	N	N	N	N	N	N	N	N	N	N	N	N	N
M	NA	45	N	N	N	N	N	N	N	N	N	N	N	N	N	N	N
M	NA	46	N	N	N	N	N	N	N	N	N	N	N	N	N	N	N
M	NA	47	N	N	N	N	N	N	N	N	N	N	N	N	N	N	N
M	NA	48	N	N	N	N	N	N	N	N	N	N	N	N	N	N	N
M	NA	45	N	N	N	N	N	N	N	N	N	N	N	N	N	N	N
M	NA	46	N	N	N	N	N	N	N	N	N	N	N	N	N	N	N
M	NA	65	N	N	N	N	N	N	N	N	N	N	N	N	N	N	N
M	NA	63	N	N	N	N	N	N	N	N	N	N	N	N	N	N	N
M	NA	63	N	N	N	N	N	N	N	N	N	N	N	N	N	N	N
M	NA	63	N	N	N	N	N	N	N	N	N	N	N	N	N	N	N
M	NA	63	N	N	N	N	N	N	N	N	N	N	N	N	N	N	N
M	NA	63	N	N	N	N	N	N	N	N	N	N	N	N	N	N	N
M	NA	67	N	N	N	N	N	N	N	N	N	N	N	N	N	N	N
M	NA	52	N	N	N	N	N	N	N	N	N	N	N	N	N	N	N
M	NA	52	N	N	N	N	N	N	N	N	N	N	N	N	N	N	N
M	NA	66	N	N	N	N	N	N	N	N	N	N	N	N	N	N	N
M	NA	51	N	N	N	N	N	N	N	N	N	N	N	N	N	N	N
M	NA	66	N	N	N	N	N	N	N	N	N	N	N	N	N	N	N
M	NA	77	N	N	N	N	N	N	N	N	N	N	N	N	N	N	N
M	NA	66	N	N	Y	N	N	N	N	N	N	N	N	N	N	N	N
M	NA	56	N	N	N	N	N	N	N	N	N	N	N	N	N	N	N
M	NA	51	N	N	N	N	N	N	N	N	N	N	N	N	N	N	N
M	NA	55	N	N	N	N	N	N	N	N	N	N	N	N	N	N	N
M	NA	79	N	N	N	N	N	N	N	N	N	N	N	N	N	N	N
M	NA	47	N	N	N	N	N	N	N	N	N	N	N	N	N	N	N
M	NA	51	N	N	N	N	N	N	N	N	N	N	N	N	N	N	N
M	NA	55	N	N	N	N	N	N	N	N	N	N	N	N	N	N	N
M	NA	66	N	N	N	N	N	N	N	N	N	N	N	N	N	N	N
M	NA	69	N	N	N	N	N	N	N	N	N	N	N	N	N	N	N
M	NA	62	N	N	N	N	N	N	N	N	N	N	N	N	N	N	N
M	NA	52	N	N	N	N	N	N	N	N	N	N	N	N	N	N	N
M	NA	66	N	N	N	N	N	N	N	N	N	N	N	N	N	N	N
M	NA	49	N	N	N	N	N	N	N	N	N	N	N	N	N	N	N
M	NA	65	N	N	N	N	N	N	N	N	N	N	N	N	N	N	N
M	NA	71	N	N	N	N	N	N	N	N	N	N	N	N	N	N	N
M	NA	62	N	N	N	N	N	N	N	N	N	N	N	N	N	N	N
M	NA	77	N	N	N	N	N	N	N	N	N	N	N	N	N	N	N
M	NA	65	N	N	N	N	N	N	N	N	N	N	N	N	N	N	N
M	NA	56	N	N	N	N	N	N	N	N	N	N	N	N	N	N	N
M	NA	66	N	N	N	N	N	N	N	N	N	N	N	N	N	N	N
M	NA	70	N	N	N	N	N	N	N	N	N	N	N	N	N	N	N
M	NA	67	N	N	N	N	N	N	N	N	N	N	N	N	N	N	N
M	NA	47	N	N	N	N	N	N	N	N	N	N	N	N	N	N	N
M	NA	55	N	N	N	N	N	N	N	N	N	N	N	N	N	N	N
M	NA	72	N	N	N	N	N	N	N	N	N	N	N	N	N	N	N
M	NA	65	N	N	N	N	N	N	N	N	N	N	N	N	N	N	N
M	NA	49	N	N	N	N	N	N	N	N	N	N	N	N	N	N	N
M	NA	65	N	N	Y	Y	N	N	N	N	N	N	N	N	N	N	N
M	NA	72	N	N	N	Y	N	Y	N	N	N	N	N	N	N	N	N
M	NA	65	N	N	N	N	N	N	N	N	N	N	N	N	N	N	N
M	NA	63	N	N	N	N	N	N	N	N	N	N	N	N	N	N	N
M	NA	55	N	N	N	N	N	N	N	N	N	N	N	N	N	N	N
M	NA	66	N	N	N	N	N	N	N	N	N	N	N	N	N	N	N
M	NA	67	N	N	N	N	N	N	N	N	N	N	N	N	N	N	N
M	NA	77	N	N	N	N	N	N	N	N	N	N	N	N	N	N	N
M	NA	51	N	N	N	N	N	N	N	N	N	N	N	N	N	N	N
M	NA	51	N	N	N	N	N	N	N	N	N	N	N	N	N	N	N
M	NA	63	N	N	N	N	N	N	N	N	N	N	N	N	N	N	N
M	NA	67	N	N	N	N	N	N	N	N	N	N	N	N	N	N	N
M	NA	66	N	N	N	N	N	N	N	N	N	N	N	N	N	N	N
M	NA	63	N	N	N	N	N	N	N	N	N	N	N	N	N	N	N
M	NA	65	N	N	N	N	N	N	N	N	N	N	N	N	N	N	N
M	NA	67	N	N	N	N	N	N	N	N	N	N	N	N	N	N	N
M	NA	46	N	N	N	N	N	N	N	N	N	N	N	N	N	N	N
M	NA	63	N	N	N	N	N	N	N	N	N	N	N	N	N	N	N
M	NA	63	N	N	N	N	N	N	N	N	N	N	N	N	N	N	N
M	NA	67	N	N	N	N	N	N	N	N	N	N	N	N	N	N	N
M	NA	45	N	N	N	N	N	N	N	N	N	N	N	N	N	N	N
M	NA	63	N	N	N	N	N	N	N	N	N	N	N	N	N	N	N
M	NA	46	N	N	N	N	N	N	N	N	N	N	N	N	N	N	N
M	NA	69	N	N	N	N	N	N	N	N	N	N	N	N	N	N	N
M	NA	66	N	N	N	N	N	N	N	N	N	N	N	N	N	N	N
M	NA	67	N	N	N	N	N	N	N	N	N	N	N	N	N	N	N
M	NA	51	N	N	N	N	N	N	N	N	N	N	N	N	N	N	N
M	NA	44	N	N	N	N	N	N	N	N	N	N	N	N	N	N	N
M	NA	51	N	N	N	N	N	N	N	N	N	N	N	N	N	N	N
M	NA	62	N	N	N	N	N	N	N	N	N	N	N	N	N	N	N
M	NA	66	N	N	N	N	N	N	N	N	N	N	N	N	N	N	N
M	NA	66	N	N	N	N	N	N	N	N	N	N	N	N	N	N	N
M	NA	63	N	N	N	N	N	N	N	N	N	N	N	N	N	N	N
M	NA	67	N	N	N	N	N	N	N	N	N	N	N	N	N	N	N
M	NA	66	N	N	N	N	N	N	N	N	N	N	N	N	N	N	N
M	NA	45	N	N	N	N	N	N	N	N	N	N	N	N	N	N	N
M	NA	52	N	N	N	N	N	N	N	N	N	N	N	N	N	N	N
M	NA	52	N	N	N	N	N	N	N	N	N	N	N	N	N	N	N
M	NA	67	N	N	N	N	N	N	N	N	N	N	N	N	N	N	N
M	NA	77	N	N	N	N	N	N	N	N	N	N	N	N	N	N	N
M	NA	52	N	N	N	N	N	N	N	N	N	N	N	N	N	N	N
M	NA	63	N	N	N	N	N	N	N	N	N	N	N	N	N	N	N
M	NA	66	N	N	N	N	N	N	N	N	N	N	N	N	N	N	N
M	NA	63	N	N	N	N	N	N	N	N	N	N	N	N	N	N	N
M	NA	69	N	N	N	N	N	N	N	N	N	N	N	N	N	N	N
M	NA	74	N	N	N	N	N	N	N	N	N	N	N	N	N	N	N
M	NA	51	N	N	N	N	N	N	N	N	N	N	N	N	N	N	N
M	NA	68	N	N	N	N	N	N	N	N	N	N	N	N	N	N	N
M	NA	66	N	N	N	N	N	N	N	N	N	N	N	N	N	N	N
M	NA	48	N	N	N	N	N	Y	N	N	N	N	N	N	N	N	N
M	NA	66	N	N	N	N	N	N	N	N	N	N	N	N	N	N	N
M	NA	52	N	N	N	N	N	N	N	N	N	N	N	N	N	N	N
M	NA	65	N	N	N	N	N	N	N	N	N	N	N	N	N	N	N
M	NA	51	N	N	N	N	N	N	N	N	N	N	N	N	N	N	N
M	NA	69	N	N	N	N	N	N	N	N	N	N	N	N	N	N	N
M	NA	66	N	N	N	N	N	N	N	N	N	N	N	N	N	N	N
		60.241	Q1	Q2	Q3	Q4	Q5	Q6	Q7	Q8	Q9	Q10	Q11	Q12	Q13	Q14	Q15

## Sheet: Neglected subjects 
F	59	Comb	ILL	S	23	Low	Illiterate
F	56	Comb	ILL	B/S	23	Low	Lit
F	59	Comb	ILL	O	21	Low	Illiterate
F	53	Comb	ILL	S	22	Low	Illiterate
F	57	Comb	ILL	S	22	Low	Illiterate
F	54	Comb	ILL	S	23	Low	Illiterate
F	53	Comb	ILL	S	23	Low	Illiterate
F	52	Comb	ILL	S	24	High	Illiterate
F	57	Comb	ILL	Sp	23	Low	Illiterate
F	62	Comb	ILL	S	24	Low	Illiterate
F	64	Comb	ILL	S	26	Low	Lit
F	65	Comb	I	DIL	31	Average	ILL
F	49	Comb	I	S	18	Low	LIT
F	54	Comb	I	S	24	Low	ILL
F	68	Comb	I	DIL	24	Low	LIT
F	70	Comb	I	DIL	38	Low	ILL
F	55	Neg	I	S	23	Low	LIT
F	56	Neg	I	S	26	Low	ILL
F	67	Neg	I	S	32	Low	LIT
F	56	Neg	I	DIL	22	High	ILL
F	57	Neg	LIT	S	25	Low	ILL
F	76	Neg	I	DIL	38	Low	ILL
M	71	Comb	ILL	S	23	Low	Illiterate
M	57	Comb	LITT	S	23	Low	Illiterate
M	65	Comb	LITT	S	27	Low	Illiterate
M	55	Comb	ILL	S	25	Low	Illiterate
M	51	Comb	ILL	S	24	Low	Illiterate
M	53	Comb	ILL	DIL	24	Low	Illiterate
M	77	Comb	ILL	S	32	Average	Illiterate
M	73	Comb	ILL	O	38	Low	Lit
M	67	Comb	ILL	S	35	Low	Illiterate
M	80	Comb	ILL	DIL	51	Low	Illiterate
M	54	Comb	ILL	S	23	Low	Illiterate
M	57	Comb	ILL	S	18	Low	Illiterate
M	58	Comb	ILL	S	27	Low	Illiterate
M	58	Neg	ILL	S	21	Low	Illiterate
M	52	Neg	LITT	S	27	Average	Illiterate
M	65	Neg	ILL	S	27	Low	Illiterate
M	65	Neg	LITT	DIL	27	Low	Illiterate
M	80	Neg	ILL	S	47	Average	Illiterate
M	76	Neg	ILL	S	37	Average	Illiterate
M	65	Neg	ILL	DIL	25	Average	Illiterate
M	62	Neg	ILL	S	25	Low	Illiterate
M	56	Neg	ILL	S	24	Low	Illiterate
M	57	Neg	ILL	DIL	24	Low	Illiterate
M	58	Neg	ILL	DIL	24	Average	Illiterate
M	80	Neg	ILL	S	51	Low	Illiterate
M	72	Neg	ILL	DIL	35	Low	Lit
M	77	Neg	ILL	S	48	Low	Lit
M	66	Neg	ILL	S	37	Low	Illiterate
M	68	Neg	ILL	DIL	38	Average	Illiterate
M	51	Neg	ILL	S	19	Low	Lit
M	63	Neg	ILL	DIL	31	Low	Illiterate
M	65	Neg	ILL	DIL	31	Low	Illiterate
M	52	Neg	ILL	DIL	21	Average	Lit
M	65	Neg	ILL	DIL	21	Low	Illiterate
M	66	Neg	ILL	DIL	21	Average	Lit
M	73	Neg	ILL	S	32	Average	Lit
M	72	Neg	LITT	Sp	39	Low	Illiterate
M	73	Neg	ILL	S	38	Low	Illiterate
M	58	Neg	ILL	S	23	Low	Illiterate
M	78	Neg	ILL	B/S	38	Average	Illiterate
M	70	Neg	ILL	S	35	High	Illiterate
M	67	Neg	ILL	S	33	Low	Illiterate
M	72	Neg	ILL	Sp	34	Low	Illiterate
M	54	Neg	ILL	DIL	17	Low	Illiterate
M	61	Neg	ILL	DIL	24	Average	Lit
M	51	Neg	LITT	DIL	24	High	Illiterate
M	80	Neg	ILL	Sp	51	Low	Illiterate
M	73	Neg	LITT	S	38	Low	Illiterate
M	55	Neg	ILL	DIL	23	Average	Lit
M	49	Neg	ILL	S	23	Average	Illiterate
M	65	Neg	ILL	S	35	Average	Lit
M	45	Neg	ILL	DIL	19	Low	Illiterate
M	56	Neg	ILL	DIL	21	Average	Lit
M	56	Neg	ILL	S	21	Average	Illiterate
M	55	Neg	ILL	DIL	21	Low	Illiterate
M	46	Neg	ILL	DIL	17	Average	Lit
M	51	Neg	ILL	S	17	Average	Lit
M	65	Neg	ILL	DIL	32	Average	Lit
M	71	Neg	ILL	DIL	31	Low	Illiterate
M	68	Neg	ILL	Sp	22	High	Illiterate
M	70	Neg	ILL	Sp	24	Low	Illiterate
M	71	Neg	ILL	S	23	Low	Illiterate
M	67	Neg	ILL	S	23	Low	Illiterate
M	54	Neg	ILL	S	27	High	Illiterate
M	56	Comb	I	S	27	High	ILL
M	55	Comb	I	S	25	Low	ILL
M	67	Comb	LIT	S	37	Low	ILL
M	80	Comb	I	Sp	49	Low	ILL
M	54	Comb	LIT	S	23	Low	ILL
M	68	Comb	I	DIL	38	Low	ILL
M	57	Comb	I	DIL	21	Average	LIT
M	59	Comb	I	DIL	21	Low	ILL
M	72	Comb	I	DIL	31	High	ILL
M	80	Comb	LIT	S	52	Low	ILL
M	51	Comb	I	S	19	Low	ILL
M	53	Neg	I	S	27	Low	ILL
M	64	Neg	LIT	S	27	Low	ILL
M	65	Neg	I	DIL	27	Low	ILL
M	65	Neg	I	S	27	Low	ILL
M	66	Neg	I	Sp	34	Low	ILL
M	77	Neg	LIT	B/S	39	Low	ILL
M	63	Neg	I	S	25	Low	ILL
M	52	Neg	I	S	24	High	ILL
M	76	Neg	I	S	33	Low	ILL
M	77	Neg	I	Sp	34	Low	ILL
M	79	Neg	LIT	S	38	Low	ILL
M	80	Neg	I	DIL	48	Average	ILL
M	71	Neg	LIT	S	38	Low	ILL
M	58	Neg	I	Sp	24	Low	LIT
M	74	Neg	LIT	S	37	Low	LIT
M	76	Neg	I	DIL	34	Low	ILL
M	76	Neg	I	S	38	Low	ILL
M	75	Neg	LIT	Sp	38	Low	ILL
M	77	Neg	I	S	45	Low	LIT
M	72	Neg	I	DIL	39	Average	ILL
M	80	Neg	I	Sp	48	Average	LIT
M	73	Neg	I	S	38	Low	LIT
M	57	Neg	I	DIL	23	Low	ILL
M	67	Neg	I	Sp	37	Low	ILL
M	56	Neg	I	DIL	23	Low	ILL
M	67	Neg	I	S	23	Low	ILL
M	52	Neg	LIT	Sp	18	Average	LIT
M	66	Neg	I	DIL	33	Low	LIT
M	66	Neg	I	DIL	34	Low	LIT
M	66	Neg	I	S	35	Low	LIT
M	56	Neg	I	S	23	Low	LIT
M	65	Neg	I	DIL	31	Low	ILL
M	62	Neg	I	S	31	Low	LIT
M	66	Neg	I	DIL	36	Average	ILL
M	66	Neg	I	DIL	31	Low	ILL
M	66	Neg	I	S	31	Low	ILL
M	54	Neg	I	S	23	Low	LIT
M	69	Neg	I	S	31	Low	ILL
M	55	Neg	I	S	23	Average	ILL
M	64	Neg	I	DIL	21	Low	ILL
M	54	Neg	I	S	21	Low	ILL
M	57	Neg	I	DIL	21	Low	ILL
M	57	Neg	I	DIL	21	Low	ILL
M	76	Neg	I	S	32	Average	ILL
M	66	Neg	I	DIL	21	Low	ILL
M	63	Neg	LIT	S	21	High	ILL
M	77	Neg	I	B/S	34	High	ILL
M	72	Neg	LIT	DIL	35	Low	ILL
M	66	Neg	I	S	35	Average	ILL
M	55	Neg	I	S	19	Average	ILL
M	75	Neg	I	S	39	High	ILL
M	56	Neg	I	DIL	24	Low	ILL
M	52	Neg	I	S	18	Average	LIT

## Sheet: Group A control (Raw) 
F	65	Comb	I	DIL	31	Average	ILL	3	4	6	4	5	4	4	5	5
F	49	Comb	I	S	18	Low	LIT	2	5	6	5	5	6	3	4	4
F	54	Comb	I	S	24	Low	ILL	3	4	6	5	6	5	4	7	5
F	68	Comb	I	DIL	24	Low	LIT	3	6	5	3	4	6	3	5	6
F	70	Comb	I	DIL	38	Low	ILL	2	5	6	4	4	5	4	4	4
M	56	Comb	I	S	27	High	ILL	2	2	4	3	5	6	4	5	5
M	55	Comb	I	S	25	Low	ILL	2	4	4	3	6	5	6	6	4
M	67	Comb	LIT	S	37	Low	ILL	2	6	4	3	5	4	4	6	5
M	80	Comb	I	Sp	49	Low	ILL	3	7	4	4	4	5	6	5	6
M	54	Comb	LIT	S	23	Low	ILL	4	4	6	4	4	5	3	4	5
M	68	Comb	I	DIL	38	Low	ILL	3	7	4	5	4	4	3	5	6
M	57	Comb	I	DIL	21	Average	LIT	3	4	4	4	3	6	4	5	3
M	59	Comb	I	DIL	21	Low	ILL	3	3	5	4	4	5	3	5	4
M	72	Comb	I	DIL	31	High	ILL	4	3	4	5	4	6	5	6	6
M	80	Comb	LIT	S	52	Low	ILL	3	3	6	4	6	5	5	6	7
M	51	Comb	I	S	19	Low	ILL	3	4	4	5	5	6	5	6	5
F	55	Neg	I	S	23	Low	LIT	2	5	7	6	5	5	6	4	4
F	56	Neg	I	S	26	Low	ILL	3	4	5	4	4	5	5	5	4
F	67	Neg	I	S	32	Low	LIT	2	6	6	5	6	5	6	5	7
F	56	Neg	I	DIL	22	High	ILL	2	6	6	4	3	5	4	4	5
F	57	Neg	LIT	S	25	Low	ILL	3	4	5	4	4	5	3	5	4
F	76	Neg	I	DIL	38	Low	ILL	2	5	4	3	4	6	3	5	5
M	53	Neg	I	S	27	Low	ILL	2	4	6	4	4	4	5	7	4
M	64	Neg	LIT	S	27	Low	ILL	3	4	4	4	7	5	5	5	7
M	65	Neg	I	DIL	27	Low	ILL	3	4	6	3	5	6	5	5	4
M	65	Neg	I	S	27	Low	ILL	3	5	7	4	3	5	5	5	3
M	66	Neg	I	Sp	34	Low	ILL	3	4	5	5	3	7	6	6	3
M	77	Neg	LIT	B/S	39	Low	ILL	2	5	4	4	5	6	5	5	4
M	63	Neg	I	S	25	Low	ILL	2	5	7	5	4	4	5	5	5
M	52	Neg	I	S	24	High	ILL	3	4	4	5	6	5	6	5	4
M	76	Neg	I	S	33	Low	ILL	3	4	3	5	6	5	4	6	5
M	77	Neg	I	Sp	34	Low	ILL	3	5	3	6	4	4	5	4	4
M	79	Neg	LIT	S	38	Low	ILL	3	7	3	5	4	3	6	4	4
M	80	Neg	I	DIL	48	Average	ILL	4	4	4	4	4	4	4	4	4
M	71	Neg	LIT	S	38	Low	ILL	4	4	5	3	4	4	4	4	5
M	58	Neg	I	Sp	24	Low	LIT	3	5	4	4	6	5	6	5	4
M	74	Neg	LIT	S	37	Low	LIT	3	6	6	4	6	4	6	6	5
M	76	Neg	I	DIL	34	Low	ILL	3	5	6	3	5	4	5	6	5
M	76	Neg	I	S	38	Low	ILL	4	4	4	5	4	6	4	6	5
M	75	Neg	LIT	Sp	38	Low	ILL	3	5	5	5	3	3	6	6	4
M	77	Neg	I	S	45	Low	LIT	3	6	4	5	4	4	5	4	4
M	72	Neg	I	DIL	39	Average	ILL	3	4	6	5	5	6	5	4	4
M	80	Neg	I	Sp	48	Average	LIT	4	5	5	5	3	6	5	4	6
M	73	Neg	I	S	38	Low	LIT	3	6	5	3	4	4	6	5	6
M	57	Neg	I	DIL	23	Low	ILL	3	4	4	4	4	4	4	6	6
M	67	Neg	I	Sp	37	Low	ILL	4	6	4	3	4	4	6	5	3
M	56	Neg	I	DIL	23	Low	ILL	3	5	7	4	5	4	5	5	6
M	67	Neg	I	S	23	Low	ILL	4	4	3	3	4	4	4	5	5
M	52	Neg	LIT	Sp	18	Average	LIT	3	4	5	4	5	5	4	5	6
M	66	Neg	I	DIL	33	Low	LIT	4	5	6	5	5	4	5	5	6
M	66	Neg	I	DIL	34	Low	LIT	3	4	5	5	4	5	4	5	6
M	66	Neg	I	S	35	Low	LIT	3	4	4	3	4	4	4	4	5
M	56	Neg	I	S	23	Low	LIT	3	6	7	4	5	4	6	4	5
M	65	Neg	I	DIL	31	Low	ILL	2	6	4	5	6	3	6	5	7
M	62	Neg	I	S	31	Low	LIT	3	4	3	3	6	4	4	4	6
M	66	Neg	I	DIL	36	Average	ILL	2	3	4	4	6	5	3	6	6
M	66	Neg	I	DIL	31	Low	ILL	3	5	5	5	6	4	4	6	6
M	66	Neg	I	S	31	Low	ILL	2	5	4	6	6	5	6	6	6
M	54	Neg	I	S	23	Low	LIT	3	4	4	5	4	5	6	6	6
M	69	Neg	I	S	31	Low	ILL	3	5	5	4	3	6	6	6	6
M	55	Neg	I	S	23	Average	ILL	3	4	6	3	4	6	4	6	6
M	64	Neg	I	DIL	21	Low	ILL	2	5	4	4	6	5	5	6	6
M	54	Neg	I	S	21	Low	ILL	2	4	4	4	5	5	4	6	6
M	57	Neg	I	DIL	21	Low	ILL	3	5	4	3	5	6	5	6	4
M	57	Neg	I	DIL	21	Low	ILL	3	4	6	5	6	6	4	5	4
M	76	Neg	I	S	32	Average	ILL	3	5	5	5	4	6	5	5	6
M	66	Neg	I	DIL	21	Low	ILL	3	5	4	5	5	5	5	4	6
M	63	Neg	LIT	S	21	High	ILL	4	5	5	5	6	6	5	4	6
M	77	Neg	I	B/S	34	High	ILL	4	5	4	3	4	6	5	4	5
M	72	Neg	LIT	DIL	35	Low	ILL	3	5	5	5	3	6	5	6	4
M	66	Neg	I	S	35	Average	ILL	3	4	5	4	6	5	3	6	5
M	55	Neg	I	S	19	Average	ILL	3	6	4	5	4	6	4	5	5
M	75	Neg	I	S	39	High	ILL	4	4	6	5	5	6	6	6	5
M	56	Neg	I	DIL	24	Low	ILL	3	6	5	5	4	7	6	5	4
M	52	Neg	I	S	18	Average	LIT	2	5	5	3	5	6	5	6	6
							Average	2.92	4.69333	4.84	4.24	4.64	5	4.72	5.14667	5.02667

## Sheet: Group B Test (Raw)
F	59	Comb	ILL	S	23	Low	Illiterate	2	8	7	8	7	9	7	9	7
F	56	Comb	ILL	B/S	23	Low	Lit	2	8	7	9	9	6	7	8	9
F	59	Comb	ILL	O	21	Low	Illiterate	1	9	8	9	7	9	7	9	7
F	53	Comb	ILL	S	22	Low	Illiterate	1	9	7	8	7	9	7	9	7
F	57	Comb	ILL	S	22	Low	Illiterate	1	8	8	8	7	8	7	8	7
F	54	Comb	ILL	S	23	Low	Illiterate	2	9	9	9	9	9	7	9	9
F	53	Comb	ILL	S	23	Low	Illiterate	1	9	8	10	8	10	7	9	8
F	52	Comb	ILL	S	24	High	Illiterate	2	9	9	8	7	8	6	9	7
F	57	Comb	ILL	Sp	23	Low	Illiterate	1	8	9	9	10	9	9	8	7
F	62	Comb	ILL	S	24	Low	Illiterate	2	9	10	9	5	9	6	9	9
F	64	Comb	ILL	S	26	Low	Lit	1	9	8	9	7	10	8	9	7
M	71	Comb	ILL	S	23	Low	Illiterate	1	7	9	6	7	8	7	9	7
M	57	Comb	LITT	S	23	Low	Illiterate	1	9	9	9	8	8	7	9	8
M	65	Comb	LITT	S	27	Low	Illiterate	2	9	9	9	7	8	6	9	9
M	55	Comb	ILL	S	25	Low	Illiterate	1	7	8	8	9	9	8	9	9
M	51	Comb	ILL	S	24	Low	Illiterate	1	8	9	9	7	7	9	8	7
M	53	Comb	ILL	DIL	24	Low	Illiterate	1	8	9	10	7	8	9	8	7
M	77	Comb	ILL	S	32	Average	Illiterate	1	9	8	8	8	9	8	9	7
M	73	Comb	ILL	O	38	Low	Lit	1	8	7	9	7	9	7	8	7
M	67	Comb	ILL	S	35	Low	Illiterate	1	8	8	9	6	9	8	9	6
M	80	Comb	ILL	DIL	51	Low	Illiterate	1	9	6	9	8	9	6	9	8
M	54	Comb	ILL	S	23	Low	Illiterate	2	8	10	8	9	10	10	10	7
M	57	Comb	ILL	S	18	Low	Illiterate	2	9	8	8	9	9	8	9	9
M	58	Comb	ILL	S	27	Low	Illiterate	1	9	8	8	8	9	8	9	8
M	58	Neg	ILL	S	21	Low	Illiterate	1	7	9	8	8	8	9	9	8
M	52	Neg	LITT	S	27	Average	Illiterate	1	8	9	9	6	8	9	8	6
M	65	Neg	ILL	S	27	Low	Illiterate	2	8	8	9	7	8	8	8	7
M	65	Neg	LITT	DIL	27	Low	Illiterate	1	9	6	8	9	8	6	9	9
M	80	Neg	ILL	S	47	Average	Illiterate	1	9	7	9	10	7	7	9	9
M	76	Neg	ILL	S	37	Average	Illiterate	2	8	7	9	9	7	7	8	9
M	65	Neg	ILL	DIL	25	Average	Illiterate	2	9	7	9	8	8	7	9	8
M	62	Neg	ILL	S	25	Low	Illiterate	2	8	9	8	9	7	9	8	9
M	56	Neg	ILL	S	24	Low	Illiterate	2	8	7	8	8	8	7	8	8
M	57	Neg	ILL	DIL	24	Low	Illiterate	2	7	7	9	7	9	7	7	7
M	58	Neg	ILL	DIL	24	Average	Illiterate	1	8	7	9	8	8	7	8	8
M	80	Neg	ILL	S	51	Low	Illiterate	1	8	9	7	9	9	6	8	9
M	72	Neg	ILL	DIL	35	Low	Lit	1	9	8	9	8	8	6	9	8
M	77	Neg	ILL	S	48	Low	Lit	2	9	7	9	9	9	7	9	9
M	66	Neg	ILL	S	37	Low	Illiterate	1	9	10	7	8	7	6	9	8
M	68	Neg	ILL	DIL	38	Average	Illiterate	1	8	6	8	7	7	6	8	7
M	51	Neg	ILL	S	19	Low	Lit	1	8	5	8	9	7	5	8	9
M	63	Neg	ILL	DIL	31	Low	Illiterate	1	7	7	9	8	7	7	7	8
M	65	Neg	ILL	DIL	31	Low	Illiterate	2	7	7	8	7	8	6	6	7
M	52	Neg	ILL	DIL	21	Average	Lit	2	7	8	8	9	8	8	8	8
M	65	Neg	ILL	DIL	21	Low	Illiterate	1	9	9	8	9	7	8	9	9
M	66	Neg	ILL	DIL	21	Average	Lit	1	9	6	8	9	8	8	9	9
M	73	Neg	ILL	S	32	Average	Lit	1	8	7	9	8	7	7	8	8
M	72	Neg	LITT	Sp	39	Low	Illiterate	2	8	6	9	8	8	8	8	8
M	73	Neg	ILL	S	38	Low	Illiterate	2	9	6	9	9	9	8	9	9
M	58	Neg	ILL	S	23	Low	Illiterate	1	10	8	8	9	8	8	10	9
M	78	Neg	ILL	B/S	38	Average	Illiterate	1	8	9	8	8	8	9	8	8
M	70	Neg	ILL	S	35	High	Illiterate	1	9	9	8	7	7	6	9	7
M	67	Neg	ILL	S	33	Low	Illiterate	2	8	9	7	8	8	6	8	8
M	72	Neg	ILL	Sp	34	Low	Illiterate	2	9	9	8	8	9	9	9	8
M	54	Neg	ILL	DIL	17	Low	Illiterate	1	6	8	9	8	9	8	8	7
M	61	Neg	ILL	DIL	24	Average	Lit	2	9	9	8	8	7	8	9	8
M	51	Neg	LITT	DIL	24	High	Illiterate	1	9	8	9	9	8	8	9	7
M	80	Neg	ILL	Sp	51	Low	Illiterate	1	8	9	8	9	9	8	8	7
M	73	Neg	LITT	S	38	Low	Illiterate	1	9	7	8	8	9	7	9	8
M	55	Neg	ILL	DIL	23	Average	Lit	1	10	7	8	9	9	7	10	9
M	49	Neg	ILL	S	23	Average	Illiterate	1	8	9	8	8	8	6	8	7
M	65	Neg	ILL	S	35	Average	Lit	1	9	8	7	8	7	7	10	8
M	45	Neg	ILL	DIL	19	Low	Illiterate	2	9	7	8	7	9	7	9	7
M	56	Neg	ILL	DIL	21	Average	Lit	1	9	9	9	7	8	6	9	9
M	56	Neg	ILL	S	21	Average	Illiterate	2	10	7	9	8	7	7	8	8
M	55	Neg	ILL	DIL	21	Low	Illiterate	2	8	8	9	9	8	8	8	9
M	46	Neg	ILL	DIL	17	Average	Lit	1	8	8	8	9	6	8	8	7
M	51	Neg	ILL	S	17	Average	Lit	1	8	9	8	8	8	7	8	8
M	65	Neg	ILL	DIL	32	Average	Lit	1	9	7	7	7	7	7	8	8
M	71	Neg	ILL	DIL	31	Low	Illiterate	1	8	8	8	8	9	7	8	9
M	68	Neg	ILL	Sp	22	High	Illiterate	2	8	8	9	7	8	7	7	8
M	70	Neg	ILL	Sp	24	Low	Illiterate	1	9	9	8	8	9	8	8	7
M	71	Neg	ILL	S	23	Low	Illiterate	2	8	9	9	8	9	9	9	9
M	67	Neg	ILL	S	23	Low	Illiterate	2	8	8	9	7	9	8	8	9
M	54	Neg	ILL	S	27	High	Illiterate	1	8	9	8	8	9	8	8	7
								1.37333	8.38667	7.96	8.4	7.96	8.2	7.36	8.50667	7.90667

## Sheet: Scoring criteria
Gender	Age	Abuse type	Education (abused)	Abuser type	Age care giver	Income CG	Education CG	DPI scores	Movement UD	Comfort UD	Movement LD	Comfort mandibular denture	Speech	Ease of chewing	Esthetics	General satisfaction
1 - Female	1 - 41 to 50	1 - Neglect	1 - Illiterate	1 - Son	1 - ≤ 20	1 -Low	1 - Illiterate	1 - Good	Score of 1 to 10 on VAS
2 -Male	2 - 51 to 60	2 - Psychol	2 - Primary School	2 - Daughter in law	2 - 21 to 30	2-Average	2 - Primary School	2 - Average
	3 - 61 to 70	3 - Financial	3 - Sec school	3 - Spouse	3 - 31 to 40	3 - High	3 - Sec school	3 - Poor
	4 - 71 to 80	4 - Physical	4 - Grad/Post Grad	4 - Brother/sister	4 - 41 to 50		4 - Grad/Post Grad	4 - Very poor
		5- Sexual		5 - Others	5 - ≥ 51
		6 - Comb (Neglect +)
